# Supplementary material for: Effectiveness of Varenicline and Cytisine for Alcohol Use Reduction Among People With HIV and Substance Use: A Randomized Clinical Trial
Source: PubMed Central journal article supplement (PMC9356316; doi:10.1001/jamanetworkopen.2022.25129), 2022-08-05
Supplement: jamanetwopen-e2225129-s001.pdf [file jamanetwopen-e2225129-s001.pdf]

1  
2  
3  
4  
5  
6  
7  
8  
9  
10  
11  
12  
13  
14  
15  
16  
17  
18  
19

# Studying Partial agonists for Ethanol and Tobacco Elimination in Russians with HIV (St PETER HIV)

Principal Investigators:

Jeffrey H. Samet, MD, MA, MPH – Boston Medical Center (contact)

Matthew S. Freiberg, MD, MSc - Vanderbilt University Medical Center

Hilary A. Tindle, MD, MPH – Vanderbilt University Medical Center

Study Statistician: Debbie M. Cheng, ScD – Boston University School of Public

Health

NIAAA Award Number: U01AA020780

Clinicaltrials.gov Registration: NCT02797587

Boston University Medical Campus IRB Protocol Number: H-35288

Enrollment Dates: July 19, 2017 – December 25, 2019

Statistical Analysis Plan (SAP) Version Date: 03/27/2020

20

21

22 SAP Revision History

| Date of revision | Section number changed                | Description and reason for change                                                                                                                            |
|------------------|---------------------------------------|--------------------------------------------------------------------------------------------------------------------------------------------------------------|
| 12/17/2020       | 5.1 Outcome Definitions               | Adding PEth                                                                                                                                                  |
| 12/17/2020       | 3.2 Adherence and Protocol Deviations | More detail added around definitions of adherence                                                                                                            |
| 12/17/2020       | 5.4 Additional Analyses               | Alcohol cessation using PEth and self-report                                                                                                                 |
| 1/29/2021        | 3.2 Adherence and Protocol Deviations | Additional detail around definitions of adherence                                                                                                            |
| 2/3/2021         | 5.4 Additional Analyses               | Added smoking cessation definition for participants who self-report quitting smoking, but endorse cannabis use at the 3-month visit and failed their CO test |

23

24 **SECTION 1: INTRODUCTION**

25 **1.1 STUDY HYPOTHESES**

26 We hypothesize that:

27 Hypothesis 1- Varenicline will have greater effects than NRT for reducing alcohol consumption, smoking,  
28 inflammation, CHD, and mortality risk;

29 Hypothesis 2- Cytisine will have greater effects than NRT for these outcomes; and

30 Hypothesis 3- Varenicline will have greater effects than cytisine for these outcomes.

31

32 **SECTION 2: STUDY METHODS**

33 **2.1 STUDY DESIGN**

34

35 St PETER is a Randomized Controlled Trial (RCT) among 400 HIV+ persons with heavy alcohol  
36 consumption (by NIAAA definition) who smoke, which aims to compare effects of varenicline, cytisine,  
37 and NRT on reduction of: 1) alcohol use and craving, 2) smoking, and 3) inflammation and risk for CHD  
38 and mortality. Self-reported alcohol and smoking outcomes will be assessed at 1, 3 (primary), 6, and 12  
39 months. Eligible participants will be randomly assigned into one of four study arms: 1) Varenicline + NRT  
40 placebo; 2) Varenicline placebo + NRT; 3) Cytisine + NRT placebo; 4) Cytisine placebo + NRT. All  
41 participants will receive evidence-based counseling for alcohol and tobacco use, 1 active medication,  
42 and 1 placebo. Participants in all study arms will receive brief evidence-based counseling for alcohol and  
43 tobacco use at baseline.

44 Throughout the course of the study, participants will be expected to come in for five in-person  
45 assessments and blood draw visits (baseline, 1-, 3-, 6-, and 12-months); additionally, participants will  
46 have two in-person check ins at weeks two and eight (2-months), and four check-ins via phone (weeks 1,  
47 3, 6, 10).

## 48 **2.2 RANDOMIZATION**

49 See section 3.2 of Study Protocol

## 50 **2.3 SAMPLE SIZE**

51 See section 2.8.A. of Study Protocol

## 52 **2.4 FRAMEWORK**

53 St PETER is a superiority trial that will test the following 3 comparisons:

54 Hypothesis 1- Varenicline will have greater effects than NRT for reducing alcohol consumption, smoking,  
55 inflammation, CHD, and mortality risk;

56 Hypothesis 2- Cytisine will have greater effects than NRT for these outcomes; and

57 Hypothesis 3- Varenicline will have greater effects than cytisine for these outcomes.

58 We will test each of these 3 pairwise comparisons and adjust for multiple testing within each outcome  
59 using the Hochberg sequential test procedure.

60

## 61 **2.5 STATISTICAL INTERIM ANALYSES AND STOPPING GUIDANCE**

62 No interim efficacy analyses are planned. An external Data and Safety Monitoring Board will monitor  
63 safety.

## 64 **2.6 TIMING OF FINAL ANALYSES**

65 We will analyze primary and secondary 3- and 6-month study outcomes once all 6-month outcome data  
66 have been collected and cleaned. The study will remain blinded to assessors, until all  
67 secondary/exploratory 12-month data have been collected.

## 68 **2.7 TIMING OF OUTCOME ASSESSMENTS**

69 See section 3.5A of Study Protocol

70 The schedule of study procedures is provided in Section 3.5 of the Study Protocol. The expected visit  
71 dates and visit windows are defined in Section 3.5A of the Study Protocol. All follow-up visit dates are  
72 calculated based off the date of the participant's baseline visit.

## 73 **SECTION 3: STATISTICAL PRINCIPLES**

### 74 **3.1 Confidence intervals and P values**

75 Statistical tests will be 2-sided and will be performed using an overall 5% significance test. Within each  
76 outcome, we will adjust for the multiple comparisons due to the 3 pairwise comparisons using the  
77 Hochberg sequential test procedure. Confidence intervals will be reported for measures of effect.

### 78 **3.2 Adherence and protocol deviations**

#### 79 *Pills*

80 Participants will be considered adherent to study medication if they self-report taking at least 80% of  
81 their assigned study medication on the VAS in the past week as follows:

82 Active cytisine: Reporting >80% adherence at 2 of 3 study visits prior to the 1 month visit

83 Active varenicline: Reporting >80% adherence at 4 of 7 study visits prior to the 3-month visit

#### 84 *Spray*

85 Weeks 1-4 of treatment (study assessments are 1 week, 2 weeks, and 3 weeks): Participants will be  
86 considered adherent if they report using at least 8 sprays per day at least 80% of the days in the last  
87 week (VAS) in at least 2 of 3 assessments.

88 Weeks 5-8 of treatment (study assessments at 1 month and 6 weeks): Participants are considered  
89 adherent if they report no urge to smoke or if they report using the spray at least 80% of times when  
90 having an urge to smoke in the last week (VAS) in at least 1 of 2 visits prior to the 2 month visit.

### 91 **3.3 Analysis Populations**

92 The intention-to-treat (ITT) population will include all randomized participants according to the study  
93 group assigned.

94 The per-protocol population will include all participants meeting the definition of adherence noted in  
95 section 3.2 above.

96

## 97 **SECTION 4: TRIAL POPULATION**

### 98 **4.1 Screening Data**

99 The following data will be provided for all screened participants: number of patients assessed for  
100 eligibility, number of participants enrolled, reasons for ineligibility and non-enrollment.

### 101 **4.2 Eligibility**

102 See section 2.6 and 2.7 of Study Protocol.

### 103 **4.3 Recruitment**

104 The CONSORT diagram will present data on number of participants screened, eligible, enrolled,  
105 randomized, assigned to each study arm, and completing follow up.

### 106 **4.4 Withdrawal/follow up**

107 Reasons for discontinued treatment will be presented in the CONSORT diagram/trial profile.

108 **4.5 Baseline Participant Characteristics**

109 Descriptive statistics will be calculated for the following variables at baseline overall and stratified by:  
 110 randomized group: age, sex, heavy alcohol use (defined as  $\geq 3$  vs.  $< 3$  heavy drinking days in the past  
 111 week according to NIAAA risky drinking criteria, assessed via the first 7 days of the Timeline Follow  
 112 Back)\*, average daily cigarettes ( $\leq 1$  vs.  $>1$  pack per day, assessed via question 5 of the Tobacco Use  
 113 section)\*, current ART use [yes vs. no]\*, percent heavy drinking days in the past month, education,  
 114 marital status, employment, BMI, depressive symptoms, HCV status, CD4, HIV viral load, alcohol use  
 115 disorder category, cigarettes smoked per day in the past week, recent quit attempts (smoking), pack  
 116 years, readiness to quit drinking and smoking, current marijuana use, lifetime opioid use, and current  
 117 opioid use. For continuous variables, the following will be provided: median, mean, standard deviation,  
 118 0th, 25th, 50th, 75th, and 100th percentiles. For categorical variables, frequencies and proportions will  
 119 be provided. For each primary and secondary outcome, descriptives will also be reported stratified by  
 120 arm and follow-up time, (note, no testing will be done for any of the above).

121 \*stratification factor

122 **SECTION 5: ANALYSIS**

123 **5.1 Outcome Definitions**

|                          |                                                                                                                                                                                   |  |  |  |  |
|--------------------------|-----------------------------------------------------------------------------------------------------------------------------------------------------------------------------------|--|--|--|--|
| <b>Primary (study)</b>   | Count of heavy drinking days (HDD) in the past month measured at 3 months using self-reported past 30 day alcohol consumption obtained via the Timeline Follow Back (TLFB) method |  |  |  |  |
| <b>Primary (smoking)</b> | Self-reported cigarettes per day in the past week measured at 3 months                                                                                                            |  |  |  |  |
| <b>Secondary</b>         | Alcohol craving (Penn Alcohol Craving Score)                                                                                                                                      |  |  |  |  |
| <b>Secondary</b>         | Count of HDD in the past month measured at 1 month                                                                                                                                |  |  |  |  |
| <b>Secondary</b>         | Count of HDD in the past month measured at 6 months                                                                                                                               |  |  |  |  |
| <b>Secondary</b>         | Count of HDD in the past month measured at 12 months                                                                                                                              |  |  |  |  |
| <b>Secondary</b>         | Biochemically                                                                                                                                                                     |  |  |  |  |

|                                     |                                                                                                   |  |  |  |  |
|-------------------------------------|---------------------------------------------------------------------------------------------------|--|--|--|--|
|                                     | confirmed 7-day point prevalence abstinence from smoking at 3 months                              |  |  |  |  |
| <b>Secondary</b>                    | Biochemically confirmed 7-day point prevalence abstinence from smoking at 6 months                |  |  |  |  |
| <b>Secondary</b>                    | Biochemically confirmed 7-day point prevalence abstinence from smoking at 12 months               |  |  |  |  |
| <b>Secondary (Aim 3)</b>            | Biomarkers of inflammation (hsCRP and IL-6), Reynolds Risk Score and VACS Index Score at 3 months |  |  |  |  |
| <b>Post hoc exploratory outcome</b> | Change in log PEth from baseline to 3 months                                                      |  |  |  |  |
| <b>Post hoc exploratory outcome</b> | Alcohol abstinence                                                                                |  |  |  |  |

124

125 See section 2.1 of Study Protocol.

126 **5.2 Analysis Methods**

127 The main analysis evaluating the impact of each intervention on the primary study outcome (i.e., the  
128 continuous variable % HDD at 3 months) will use multiple regression models. The models will include  
129 indicator variables to represent study arm. We will test 3 pairwise comparisons (i.e., varenicline + NRT  
130 placebo vs. NRT + varenicline placebo; cytisine + NRT placebo vs. NRT + cytisine placebo; varenicline vs.  
131 cytisine) and will adjust for the multiple comparisons using the Hochberg sequential test procedure. To  
132 improve efficiency, the regression analyses will control for stratification factors: alcohol consumption ( $\geq$   
133 3 vs.  $<$  3 heavy drinking days in the past week according to NIAAA risky drinking criteria, assessed via the  
134 first 7 days of the Timeline Follow Back), average daily cigarettes ( $\leq$  1 vs.  $>$ 1 pack per day, assessed via  
135 question 5 of the Tobacco Use section), and current ART use [yes vs. no]. If the data are normally  
136 distributed, multiple linear regression models will be used. However, if the distribution of % HDD is  
137 skewed, transformations of the data will be performed (e.g., log transformation). If outcomes are  
138 transformed to count data (e.g., number of HDD, number of cigarettes) that are not approximately  
139 normally distributed, they will be analyzed using negative binomial (to account for overdispersion)  
140 regression models. Continuous outcomes (e.g., biomarkers of inflammation, Reynold's risk score, VACS  
141 Index, primary and secondary outcomes for Aim 3) will be analyzed using the same approach described  
142 above. Binary outcomes (e.g., smoking cessation, secondary outcome Aim 2) will be analyzed using

143 logistic regression models. Models will control for stratification factors as described above for % HDD. A  
144 secondary analysis will be conducted using a per protocol approach that includes only those participants  
145 who were adherent to their assigned intervention (i.e., taking study medications or placebos 80% of the  
146 time).

### 147 **5.3 Missing Data**

148 Participants who meet eligibility criteria and agree to participate will be compared with participants who  
149 were determined to be eligible but declined enrollment on data captured during eligibility assessment.  
150 The two independent samples t-test and Fisher's exact test will be used to test for statistically significant  
151 differences between participants who enroll and those eligible who do not, and to test for significant  
152 differences between participants lost to follow-up and those who complete it. Missing data patterns will  
153 be evaluated including the frequency and percentage of participants missing for each variable and the  
154 distribution of the number of variables missing for participants. In addition, data collected to the point  
155 of loss to follow-up will be compared to the data of those who complete the study to examine missing  
156 data mechanisms. In situations where missing data occurs, we will document the reasons for the missing  
157 data whenever possible. The proposed study has accounted for a 20% random non-informative loss to  
158 follow-up and will still have sufficient power with this potential loss in size. While data may not be  
159 missing completely at random, it may be reasonable to assume that data are missing at random.

### 160 **5.4 Additional Analyses**

#### 161 **Intervention effects over time**

162 The main analyses will focus on % HDD at 3months, our primary outcome. Primary analyses of smoking  
163 and inflammation are also assessed at 3 months. However, given the repeated measures of our alcohol  
164 and smoking variables (i.e., 1, 3, 6, and 12 months), additional analyses using longitudinal regression  
165 models will be used to incorporate repeated measures for each outcome (alcohol and smoking) in the  
166 same model and will test for possible intervention by time interactions (e.g., does the effect of  
167 varenicline or cytisine change over time). For continuous outcomes (e.g., % HDD), we will use  
168 generalized linear mixed effects models that include subject-specific random intercepts and slopes to  
169 account for the correlation due to having repeated observations from each subject. For dichotomous  
170 outcomes, we will use generalized estimating equations (GEE), with an independence working  
171 correlation matrix, a logit link; standard errors will be based on the empirical-sandwich estimator.  
172 Secondary analyses will also be performed using mixed effects logistic regression models for correlated  
173 binary outcomes. The GEE approach compares population averages over time and the mixed effects  
174 approach models subject-specific effects; the latter is computationally more intensive and requires  
175 more modeling assumptions but may be more powerful if the assumptions are correct.

176

#### 177 **Effect Modification**

178 Because heavy alcohol use, depressive symptoms and opioid use are common in Russia ARCH we will  
179 perform additional analyses to explore whether baseline alcohol consumption ( $\geq 15$  HDD in past month),  
180 depressive symptoms (measured by CES-D score  $\geq 16$ ) or opioid use (self-reported history of opioid use  
181 in Russia ARCH assessment) are potential effect modifiers of the interventions. We will fit separate  
182 models that include 2-way interactions between randomization group and each potential effect

183 modifier. If an interaction is significant, subsequent stratified analyses will be conducted to evaluate the  
184 effect of varenicline/cytisine by alcohol, depressive symptoms, or opioid group. Exploratory analyses will  
185 also examine intervention effects by sex to describe and estimate effects within each subgroup.

## 186 **Mediation**

187 We will explore potential mechanisms through which the interventions are mediated. For example, the  
188 interventions may lead to a reduction in alcohol use, which in turn leads to reduced inflammation, CHD  
189 risk, and mortality risk. To assess potential mechanisms, we will use the approach described by Baron  
190 and Kenny. To assess whether alcohol use (% HDD) is in the causal pathway between the intervention  
191 and biomarkers of inflammation (hsCRP and IL-6), we will evaluate whether the following conditions  
192 hold: a) alcohol use is related to inflammation; b) the intervention is related to alcohol use; c) the  
193 intervention is related to biomarkers of inflammation; and d) The effect of the interventions on  
194 inflammation reduces appreciably when alcohol use is added to the model. We will conduct  
195 confirmatory analyses using the counterfactual framework, an approach that allows potential  
196 interactions between the interventions and mediators and derives direct and indirect effects with  
197 different types of outcomes (e.g., dichotomous). In addition to alcohol, we will also assess whether  
198 smoking is in the causal pathway between the interventions and markers of inflammation, CHD risk, and  
199 mortality risk.

200 We will also look at alcohol cessation using a combined variable of self-report and PEth. Participants will  
201 be considered abstinent if PEth<8 ng/mL and they report no alcohol use in the past 30 days.

202 For participants who self-report quitting smoking and using cannabis at the 3-month study visit and  
203 failed their CO test (>10 ppm), we will use urine cotinine < 50 mg to determine smoking cessation.

204

205

## 206 **5.5 Harms**

207 The number of participants experiencing each AE/SAE will be presented for each treatment arm and  
208 categorized by severity and organ system. No formal statistical testing will be undertaken.

209 Causes of death will be presented by study arm and time to death will be analyzed using the log-rank  
210 test. Cox proportional hazards models adjusted for stratification factors will be used to estimate hazard  
211 ratios and 95% confidence intervals.

## 212 **5.6 Statistical Software**

213 Data will be analyzed with SAS version 9.4 (SAS Institute, Inc., Cary, NC).

214



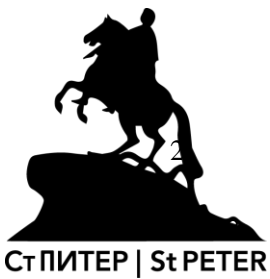

1

4

5 **Studying Partial agonists for Ethanol and**

6 **Tobacco Elimination in Russians with HIV**

7 **(St PETER HIV)**

8

9

10

11 **NIAAA Award Number: U01AA020780**

12 **Clinicaltrials.gov Registration: NCT02797587**

13 **Protocol Version: January 6, 2021**

14 **Enrollment Dates: July 19, 2017- December 25, 2019**

15

16

17

18

19

20

21

22

23

24

# TABLE OF CONTENTS

|    |                                               |            |
|----|-----------------------------------------------|------------|
| 25 |                                               |            |
| 26 | <b>1. INTRODUCTION</b>                        | <b>#5</b>  |
| 27 | 1.1 SUMMARY.....                              | #6         |
| 28 | 1.2 SIGNIFICANCE.....                         | #6         |
| 29 | <b>2. OVERVIEW OF STUDY DESIGN</b>            | <b>#6</b>  |
| 30 | 2.1 STUDY AIMS .....                          | #6         |
| 31 | 2.2 STUDY HYPOTHESES.....                     | #6         |
| 32 | 2.3 STUDY OUTCOMES.....                       | #6         |
| 33 | 2.4 STUDY DESIGN .....                        | #7         |
| 34 | 2.5 STUDY SITE.....                           | #8         |
| 35 | 2.6 INCLUSION CRITERIA.....                   | #8         |
| 36 | 2.7 EXCLUSION CRITERIA AT STUDY ENTRY.....    | #9         |
| 37 | 2.8 RECRUITMENT GOALS.....                    | #10        |
| 38 | 2.8.A. SAMPLE SIZE CALCULATION AND POWER..... | #10        |
| 39 | <b>3. INTERVENTION</b>                        | <b>#11</b> |
| 40 | 3.1 INTERVENTION OVERVIEW.....                | #11        |
| 41 | 3.2 RANDOMIZATION.....                        | #12        |
| 42 | 3.3 INTERVENTION.....                         | #12        |
| 43 | 3.3.A. VARENICLINE + NRT PLACEBO.....         | #13        |
| 44 | 3.3.B. VARENICLINE PLACEBO + NRT.....         | #14        |
| 45 | 3.3.C. CYTISINE + NRT PLACEBO.....            | #16        |
| 46 | 3.3.D. CYTISINE PLACEBO + NRT .....           | #17        |
| 47 | 3.3.E. BEHAVIORAL COUNSELING.....             | #19        |
| 48 | 3.4 MEDICATION CONSIDERATIONS.....            | #21        |
| 49 | 3.4.A. SYMPTOM MONITORING.....                | #21        |
| 50 | 3.4.B. ADHERENCE.....                         | #21        |

51 3.4.C. MEDICATION DISBURSEMENT.....#22

52 3.4.D. LOST OR STOLEN STUDY MEDICATION.....#23

53 3.4.E. DISCONTINUATION OF STUDY MEDICATION .....#23

54 **3.5 SCHEDULE OF DATA COLLECTION.....#24**

55 3.5.A. VISIT WINDOWS.....#25

56 **3.6 DATA SOURCES.....#26**

57 3.6.A QUESTIONNAIRES.....#27

58 3.6.B. BLOOD .....#27

59 3.6.C. URINE.....#30

60 3.6.D. CARBON MONOXIDE.....#31

61 3.6.E. BAC.....#31

62 3.6. F. DRIED BLOOD SPOTS.....#31

63 **4. OBSERVATIONAL COHORT #31**

64 **5. STUDY PROCEDURES #31**

65 **5.1 RECRUITMENT.....#31**

66 **5.2 SCREENING.....#32**

67 **5.3 INFORMED CONSENT.....#32**

68 5.3.A. OBSERVATIONAL COHORT.....#33

69 **5.4 VISIT FLOW.....#33**

70 **5.5 QUALITY ASSURANCE.....#34**

71 **5.6 COMPENSATION.....#35**

72 **5.7 RETENTION.....#35**

73 **6. ASSESSMENTS #33**

74 **6.1 BASELINE ASSESSMENT.....#37**

75 6.1.A. OBSERVATIONAL COHORT BASELINE ASSESSMENT.....#38

76 **6.2 FOLLOW UP ASSESSMENTS.....#38**

77 6.2.A. MEDICATION VISITS ASSESSMENTS.....#39

|     |                                                                                |            |
|-----|--------------------------------------------------------------------------------|------------|
| 78  | 6.2.B. OBSERVATIONAL COHORT ASSESSMENTS.....                                   | #39        |
| 79  | <b><u>7. PARTICIPANT SAFETY</u></b>                                            | <b>#39</b> |
| 80  | <b>7.1 SPECIFICATION OF SAFETY PARAMETERS.....</b>                             | <b>#39</b> |
| 81  | <b>7.2 THE METHODS AND TIME FOR ASSESSING, RECORDING, AND ANALYZING SAFETY</b> |            |
| 82  | <b>PARAMETERS.....</b>                                                         | <b>#40</b> |
| 83  | <b>7.3 THE METHODS AND TIME FOR ASSESSING, RECORDING, AND ANALYZING SAFETY</b> |            |
| 84  | <b>PARAMETERS AND INTERCURRENT ILLNESSES.....</b>                              | <b>#43</b> |
| 85  | 7.3.A. OTHER EVENTS.....                                                       | #44        |
| 86  | 7.3.B. PARTICIPANT ADVICE.....                                                 | #45        |
| 87  | 7.3.C. ADVERSE EVENT REPORTING.....                                            | #45        |
| 88  | 7.3.D. SAE REPORTING.....                                                      | #46        |
| 89  | <b>7.4 THE TYPE AND DURATION OF THE FOLLOW-UP OF SUBJECTS AFTER ADVERSE</b>    |            |
| 90  | <b>EVENTS.....</b>                                                             | <b>#48</b> |
| 91  | <b>7.5 UNBLINDING PROTOCOL.....</b>                                            | <b>#48</b> |
| 92  | <b>7.6 DATA SAFETY AND MONITORING BOARD.....</b>                               | <b>#49</b> |
| 93  | <b><u>8. DATA MANAGEMENT</u></b>                                               | <b>#50</b> |
| 94  | <b>8.1 DATA COLLECTION.....</b>                                                | <b>#50</b> |
| 95  | <b>8.2 QUALITY CONTROL PROCESS.....</b>                                        | <b>#50</b> |
| 96  | <b>8.3 DATA SECURITY AND CONFIDENTIALITY.....</b>                              | <b>#51</b> |
| 97  | <b>8.4 WEB SYSTEMS.....</b>                                                    | <b>#51</b> |
| 98  | <b><u>9. STATISTICAL ANALYSIS</u></b>                                          | <b>#52</b> |
| 99  | <b>9.1 PRIMARY ANALYSES.....</b>                                               | <b>#53</b> |
| 100 | <b>9.2 ADDITIONAL EXPLORATORY ANALYSES.....</b>                                | <b>#53</b> |
| 101 | <b><u>10. STAFF TRAINING</u></b>                                               | <b>#54</b> |

102

103

# 1. INTRODUCTION

## 1.1 SUMMARY

HIV infected (HIV+) heavy drinking smokers are at high risk for coronary heart disease (CHD) and death.<sup>1</sup> The mechanisms driving increased CHD risk in HIV+ people are unclear, but are linked to inflammation.<sup>2,3,4,5</sup> HIV, heavy drinking, and smoking are all pro-inflammatory.<sup>6,7</sup> HIV viral suppression with antiretroviral therapy does not eliminate the elevated CHD risk nor the increased inflammation (i.e., pre-HIV infection levels are not restored).<sup>1</sup> Interventions that reduce alcohol use, smoking, or both in HIV+ people could lower inflammation, CHD and death risk.<sup>8,9</sup> Varenicline and cytisine are proven therapies for smoking cessation.<sup>10,11-13</sup> When compared to placebo, varenicline has higher cessation rates than cytisine.<sup>11,14</sup> Human trials suggest varenicline also has efficacy for reducing alcohol consumption and craving in heavy drinking smokers.<sup>15-20,20</sup> In murine models, cytisine reduces alcohol consumption.<sup>21-23</sup> The comparative efficacy of varenicline and cytisine to reduce alcohol consumption and by extension, inflammation, CHD, and mortality risk, in humans has not been tested, nor has their comparative effectiveness been tested for smoking. Neither drug has been tested for smoking cessation against nicotine replacement therapy (NRT) in HIV+ heavy drinking smokers.

Three compelling reasons to test varenicline and cytisine in HIV+ heavy drinking smokers are: 1) both show promise in HIV-uninfected people; 2) the morbidity caused by heavy drinking and smoking in HIV+ persons is significant; and 3) treating heavy drinking and smoking with one medication represents a significant advance in reducing polypharmacy and improving patient care. Thus, we propose a 4-arm placebo-controlled randomized controlled trial (RCT) among 400 HIV+ heavy drinking smokers. The trial arms are: varenicline + NRT placebo, cytisine + NRT placebo, NRT + varenicline placebo, and NRT + cytisine placebo. All participants will receive counseling (alcohol & tobacco) and medications (placebo & active). There are 3 pairwise comparisons of interest: i) varenicline+ NRT placebo vs. NRT + varenicline placebo; ii) cytisine+ NRT placebo vs. NRT + cytisine placebo; iii) varenicline vs. cytisine. The 4-arm design allows blinding of varenicline and cytisine without placing undue burden on study participants to take more than 1 placebo, as a 3-arm design would have required. Our specific aims will compare effects of varenicline, cytisine, and NRT at 3 months on past month % heavy drinking days (% HDD) and alcohol craving, cigarettes per day and smoking abstinence (verified by carbon monoxide), inflammation (hsCRP, IL-6), CHD (Reynolds risk score), and mortality (VACS index) risk. We hypothesize that (1) Varenicline has greater efficacy than NRT for reducing heavy drinking, smoking, inflammation, CHD and mortality risk; (2) Cytisine has greater efficacy than NRT; and (3) Varenicline has greater efficacy than cytisine for these outcomes. We will conduct an RCT, Studying Partial agonists for Ethanol and Tobacco Elimination in Russians with HIV (St PETER HIV), in a country with an HIV epidemic and high per-capita alcohol consumption and smoking. We will recruit from our ongoing Russia ARCH cohort in St. Petersburg (part of our NIAAA-funded HIV/AIDS Alcohol Consortium – URBAN ARCH). If our hypotheses are correct, St PETER HIV could make nicotinic partial-agonists standard care for HIV+ heavy drinking smokers, and lead to reduced inflammation, CHD and mortality<sup>24</sup> risk through this “one drug, two diseases” approach. This trial addresses the paucity of RCT data to guide treatment of these CHD risk factors in HIV+ people.

## 1.2 SIGNIFICANCE

The Russia ARCH Cohort and the St PETER HIV study will draw from an established cohort of HIV-infected smokers and heavy drinkers to compare the effects of two partial nicotinic receptors, varenicline and cytisine, on alcohol consumption, alcohol craving, smoking, inflammation, CHD risk, and mortality risk. St PETER HIV further addresses the paucity of randomized controlled trial data to guide treatment of heavy alcohol consumption and smoking in HIV-infected people.

## 2. OVERVIEW OF STUDY DESIGN

### 2.1 STUDY AIMS

Our Specific Aims will compare effects of varenicline, cytisine, and NRT on 3 major conditions responsible for serious morbidity and mortality among HIV+ people:

**Aim 1:** % Heavy drinking days in past month (self-report, primary outcome) and alcohol craving (self-report);

**Aim 2:** Cigarettes per day (past week, self-report); 7-day point prevalence abstinence (biochemically verified);

**Aim 3:** Inflammation (hsCRP, IL-6), CHD risk (Reynolds risk score), and mortality risk (VACS index).

### 2.2 STUDY HYPOTHESES

We hypothesize that:

1. Varenicline will have greater effects than NRT for reducing alcohol consumption, smoking, inflammation, CHD, and mortality risk;
2. Cytisine will have greater effects than NRT for these outcomes; and
3. Varenicline will have greater effects than cytisine for these outcomes.

### 2.3 STUDY OUTCOMES

**Aim 1.** The primary outcome for Aim 1, % HDD in the past month measured at 3 months, will be assessed using self-reported past 30-day alcohol consumption obtained via the Timeline Followback (TLFB) method.<sup>25</sup> TLFB was adapted for the Russian setting by using local metrics recording the volume (in liters) and type of spirit consumed. Calculations convert reported data into standard drinks. We will use

177 the Penn Alcohol Craving Score [PACS] to measure Alcohol Craving (secondary outcome, Aim<sup>26</sup> 1).  
178 Additional secondary outcomes include % HDD in the past month measured at 1, 6, and 12 months.

179 **Aim 2.** The primary outcome for Aim 2, self-reported cigarettes per day in the past week measured at 3  
180 months was selected rather than cessation because prior intervention trials involving varenicline and  
181 participants who are heavy drinkers, smokers and/or who also have depressive symptoms, and/or use  
182 opioids reported significant findings more often with reductions in smoking, rather than cessation from  
183 smoking. Current cigarettes per day will be measured using the TLFB method which has been  
184 successfully employed for smoking studies and allows conversion to cigarettes per week. Because  
185 cessation is very important, we will use carbon monoxide (CO) validated smoking cessation as our  
186 secondary outcome for Aim 2. Cessation is defined as self-reported 7-day point prevalence abstinence  
187 and a CO threshold of <10 ppm, measured in end-expired air (based on guidelines for biochemical  
188 validation);<sup>27</sup> a recent, stricter definition of abstinence (CO <4-5 ppm) will also be assessed.<sup>28</sup> These  
189 variables will be captured at 1, 6, and 12 months as secondary outcomes.

190 **Aim 3.** To measure the primary outcome for Aim 3, biomarker of inflammation levels at 3 months, we  
191 selected hsCRP because these biomarkers are significantly associated with heavy alcohol consumption,  
192 smoking, incident CHD, and mortality in HIV+ people. Reynolds score and VACS index at 3 months  
193 (secondary outcomes, Aim 3) were selected because we do not have enough participants to power our  
194 intervention to CHD and mortality events, as is the case for most alcohol and tobacco trials. The Reynolds  
195 risk score assesses CHD risk, has been validated in large cohorts of men and women, and is routinely used  
196 in clinical practice.<sup>1</sup> The VACS index is a validated surrogate measure of mortality in HIV+ people.<sup>29,30</sup>

## 198 2.4 STUDY DESIGN

199  
200 St PETER is a Randomized Controlled Trial (RCT) among 400 HIV+ persons with heavy alcohol  
201 consumption (by NIAAA definition) who smoke, which aims to compare effects of varenicline, cytisine,  
202 and NRT on reduction of: 1) alcohol use and craving, 2) smoking, and 3) inflammation and risk for CHD  
203 and mortality. Self-reported alcohol and smoking outcomes will be assessed at 1, 3 (primary), 6 and 12  
204 months. Eligible participants will be randomly assigned into one of four study arms: 1) Varenicline + NRT  
205 placebo; 2) Varenicline placebo + NRT; 3) Cytisine + NRT placebo; 4) Cytisine placebo + NRT. All  
206 participants will receive evidence-based counseling for alcohol and tobacco use, 1 active medication, and  
207 1 placebo.

208 Figure 1 illustrates the design of this 4-arm parallel group RCT with 100 participants per arm. The 4-arm  
209 design allows blinding of varenicline and cytisine without placing undue burden on study participants to  
210 take more than 1 placebo, as a 3-arm design would have required. This is especially important given the  
211 different well-established dosing regimens of varenicline (3 months) and cytisine (multi-daily dosing for  
212 25 days); NRT will be administered for 8 weeks. Participants in all study arms will receive brief evidence-  
213 based counseling for alcohol and tobacco use at baseline.

**Figure 1: Study Design**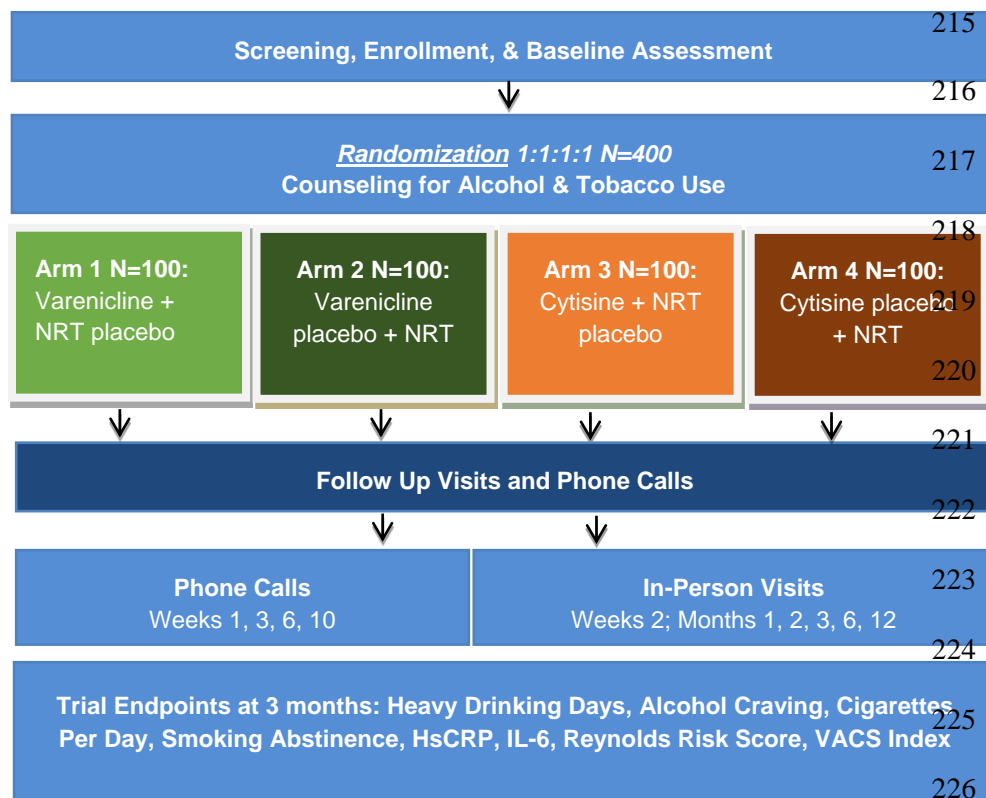

227 Throughout the course of the study, participants will be expected to come in for five in-person  
 228 assessments and blood draw visits (baseline, 1-, 3-, 6-, and 12-months); additionally, participants will  
 229 have two in-person check ins at weeks two and eight (2-months), and four check-ins via phone (weeks 1,  
 230 3, 6, 10). During these calls, participants will be monitored for adverse events.

231

## 232 2.5 STUDY SITE

233

234 Recruitment, enrollment, and all study visits will take place at the Laboratory of Clinical Pharmacology of  
 235 Addictions at the First St. Petersburg Pavlov State Medical University (PSMU) in St. Petersburg, Russia.  
 236 PSMU is the major educational, scientific, and clinical medical institution for northwestern Russia. Blood  
 237 specimens will be processed and analyzed at ImmunoBioService (IBS) under the direction of Dr. Sergei  
 238 Selkov.

239

## 240 2.6 INCLUSION CRITERIA

241

242 To be eligible to participate in the trial, participants will need to meet the following inclusion criteria:

- 243 1. 18-70 years old



- 244 2. HIV-infected
- 245 3.  $\geq 5$  heavy drinking days [i.e., NIAAA at-risk drinking levels] in the past 30 days
- 246 4. Smoking an average of at least 5 cigarettes per day
- 247 5. Provision of contact information for 2 contacts to assist with follow-up
- 248 6. Stable address within 100 kilometers of St. Petersburg
- 249 7. Possession of a telephone (home or cell)
- 250 8. Interest in cutting down alcohol or tobacco
- 251 9. Able and willing to comply with all study protocols and procedures

## 252 **2.7 EXCLUSION CRITERIA AT STUDY ENTRY**

- 254 1. Not fluent in Russian
- 255 2. Cognitive impairment resulting in inability to provide informed consent based on research  
256 assessor (RA) assessment
- 257 3. Pregnancy, planning to become pregnant in next 3 months, or breast feeding
- 258 4. Unstable psychiatric illness (i.e., answered yes to any of the following: past three month active  
259 hallucinations; mental health symptoms prompting a visit to the ED or hospital; mental health  
260 medication changes due to worsening symptoms; presence of suicidal ideations)
- 261 5. History of seizures
- 262 6. Acute coronary syndrome within 1 month of enrollment
- 263 7. Taking smoking cessation medications in the past 30 days
- 264 8. History of pheochromocytoma
- 265 9. History of Buerger's disease
- 266 10. Systolic blood pressure greater than 180 mm Hg or diastolic blood pressure greater than 105  
267 mm Hg.
- 268 11. Currently taking anti-tuberculosis medications
- 269 12. Currently taking Galantamine or Physostigmine
- 270 13. Breath alcohol content (BAC) level of 0.10% or higher
- 271 14. Known allergy to varenicline (Chantix) or cytisine (Tabex)

272  
273  
274  
275  
276  
277  
278  
279  
280  
281  
282  
283  
284  
285  
286  
287  
288  
289  
290  
291  
292  
293  
294  
295  
296  
297  
298  
299  
300  
301  
302  
303  
304  
305  
306  
307  
308  
309

## 2.8 RECRUITMENT GOALS

We aim to randomize 400 participants into the trial and a total of up to 500 may be enrolled, but not randomized due to not meeting study entry criteria. All existing Russia ARCH participants will be screened for St PETER HIV. Recruitment beyond PSMU will occur at local NGOs and Russia ARCH network hospitals, including the major clinical HIV hospitals (Botkin Infectious Disease Hospital, Leningrad Regional AIDS Center, St. Petersburg City AIDS Center) and addiction hospitals (Leningrad Regional Center for Addictions, St. Petersburg City Addiction Hospital) and through snowball recruitment; recruitment will occur over 30 months (~13 participants/month)

### 2.8.A. SAMPLE SIZE CALCULATION AND POWER

We provide power estimates for the % HDD (primary study outcome, Aim 1) and cigarettes smoked in the past week (primary outcome, Aim 2) and Inflammation and VACS index (primary and secondary outcomes, Aim 3).

**Aim 1: primary study outcome, percent heavy drinking days in the past 30 days (% HDD):** To define the limits of the study, we present power calculations to assess the differences we will be able to detect with reasonably high power for the primary study outcome: % HDD. It is expected that 400 participants will be enrolled into the study and we expect to have ~320 participants (80 participants in each of the 4 randomized groups) completing the 3-month follow-up, conservatively assuming 20% loss to follow-up. The following calculations assume 2-sided tests, with an overall significance level of 0.05. For the purposes of power calculations, we consider a simple, conservative setting based on a Bonferroni adjustment for multiple comparisons, although in our analyses we will use the Hochberg sequential correction method, an approach that will result in higher power than the Bonferroni method. To maintain an overall type I error rate of 5%, we assume each of the 3 pairwise comparisons will be conducted at an alpha level of 0.0167 for the following power calculations. Based on the Russia ARCH study participants who had  $\geq 5$  HDD and were regular smokers, the mean number of HDD in the past month was 14.7 and the standard deviation of % HDD was 27.2%. We expect the standard deviation will be similar in the proposed study. Given this assumption, the minimum detectable difference in % HDD at 3 months that the study can detect with 80% power is 14.1 for any of the 3 comparisons of interest (i.e., varenicline vs. cytisine; varenicline vs. NRT; cytisine vs. NRT), (e.g., 50% vs. 64.1% for varenicline vs. cytisine, respectively) using a 2-sided t-test. The study, therefore, has sufficient power to test for clinically important differences between any of the comparisons.

**Aim 2: primary outcome, average number cigarettes per day in the past week:** Based on the study by Litten et al.,<sup>31</sup> we assume the standard deviation for the average number of cigarettes smoked per day in the past week will be 7.6.<sup>31</sup> Given this and assuming a conservative 20% loss to follow-up at 3 months,

310 the minimum detectable difference in number of cigarettes smoked per day in the past week at 3 months  
311 that the study can detect with 80% power is 4.0 for any of the 3 comparisons of interest (e.g., 7 vs. 11 for  
312 varenicline vs. cytisine, respectively) using a 2-sided t-test.

313 **Aim 3: primary outcome, biomarkers of inflammation:** Based on ZINC HIV, the standard deviation of  
314 hsCRP at baseline was 3.6, with a mean of 5.9. We assume the standard deviation will be similar for the  
315 proposed study. Assuming a conservative 20% loss to follow-up at 3 months, the minimum detectable  
316 difference in hsCRP at 3 months that the study can detect with 80% power is 1.9 for any of the 3  
317 comparisons of interest (e.g. 4.0 vs. 5.9 for varenicline vs. cytisine, respectively) using a 2-sided t-test.

318 **Aim 3: secondary outcome VACS Index:** Based on ZINC HIV, the standard deviation (SD) of the VACS  
319 Index at follow-up among those in the placebo group was 18.7. We assume the SD will be similar for the  
320 proposed study. Assuming a conservative 20% loss to follow-up at 3 months, the minimum detectable  
321 difference in the VACS Index at 3 months that the study can detect with 80% power is 9.7 for any of the 3  
322 comparisons of interest (e.g. 30.0 vs. 39.7 for varenicline vs. cytisine, respectively) using a 2-sided t-test.

323 **Interpretation:** A VACS score of 41 translates to a 5-year mortality rate of 19.6% whereas a VACS score  
324 of 34 translates into a 5-year risk of 14.4%; thus, a ~10 point difference corresponds to a ~25% mortality  
325 relative risk reduction in 5 years.

## 327 3. INTERVENTION

### 328 3.1 INTERVENTION OVERVIEW

329  
330 The study will randomize 400 HIV+ persons with heavy alcohol consumption (by NIAAA definition of at  
331 risk drinking) who smoke. All existing Russia ARCH participants will be offered to be screened for St  
332 PETER HIV. Recruitment beyond First St. Petersburg Pavlov State Medical University (PSMU) will occur  
333 at Russia ARCH network hospitals including the major clinical HIV and addiction hospitals, local NGOs  
334 and through snowball recruitment. Some participants may be screened over the phone, but all interested  
335 potential study participants will ultimately be invited for an in-person screening of eligibility at PSMU.  
336 After eligible participants are consented and enrolled, the RA will complete screening for eligibility by  
337 conducting a rapid HIV test for non-ARCH participants, measuring participant blood pressure, breath  
338 alcohol level, and testing all women for pregnancy (urine). Once eligibility is confirmed, the RA will  
339 conduct the baseline interview and phlebotomy. Eligible participants will then be randomly assigned into  
340 one of four study arms: 1) Varenicline + NRT placebo; 2) Varenicline placebo + NRT; 3) Cytisine + NRT  
341 placebo; 4) Cytisine placebo + NRT. All participants will receive evidence-based counseling for alcohol  
342 and tobacco use, 1 active medication, and 1 placebo. Study medication will be provided by trained  
343 physicians, who will instruct participants in proper medication administration and adherence.

344 Study participants, investigators, staff, and physicians administering the medications will be unaware of  
345 specific group assignment (i.e., varenicline, cytisine, or NRT). The randomization, stratification, and  
346 assignment of participants to the 4 intervention groups will be guided and monitored by the URBAN  
347 ARCH Biostatistics and Data Management (BDM) Core. Although theoretically possible, it would not be  
348 practical or feasible to blind participants to whether they are taking varenicline or cytisine because the

349 regimens for these drugs are very different. The comparison of varenicline vs. NRT and cytisine vs. NRT  
350 will be double-blinded. Participants assigned to either partial agonist arm (varenicline or cytisine) will be  
351 blinded to whether the study medication is real or a placebo.

352 Throughout the course of the study, participants will be expected to come in for five in-person  
353 assessments and blood draw visits (baseline, 1-, 3-, 6-, and 12-months), additionally participants will  
354 have two in-person check ins at weeks two and 8 (2 months) and four check-ins via phone (weeks 1, 3, 6,  
355 10). During these calls, participants will be monitored for adverse events.

### 357 3.2 RANDOMIZATION

358  
359 Random assignment of participants into the 4 intervention groups will be conducted and monitored by  
360 the URBAN ARCH Biostatistics and Data Management (BDM) Core. The software package Statistical  
361 Analysis System (SAS) will be used to generate randomization lists to assign participants as they are  
362 enrolled into the trial. Participants will be randomized to groups in a 1:1:1:1 ratio using balanced blocks  
363 stratified by 3 factors: alcohol consumption ( $\geq 3$  vs.  $< 3$  heavy drinking days in the past week according to  
364 NIAAA risky drinking criteria, assessed via the first 7 days of the Timeline Follow Back), average daily  
365 cigarettes ( $\leq 1$  vs.  $> 1$  pack per day, assessed via question 5 of the Tobacco Use section), and current  
366 antiretroviral therapy (ART) use [yes vs. no] to ensure balance across arms. Prior to initiation of  
367 recruitment processes, the study pharmacist will receive a list of medication box IDs and group  
368 assignment from the BDM core and will deliver a supply of packaged boxes of study medication to the  
369 study team.

370 Following completion of the baseline assessment, the RA will be directed to the electronic randomization  
371 screen in REDCap, which, once submitted, automatically assigns the participant to a randomization  
372 group. The RA then retrieves the box of study medication from the identified group, labels the box with  
373 the participant study ID, and enters the box number into REDCap, thus linking the two numbers.

### 375 3.3 INTERVENTION

376  
377 Eligible participants will then be randomly assigned into one of four study arms: 1) Varenicline + NRT  
378 placebo; 2) Varenicline placebo + NRT; 3) Cytisine + NRT placebo; 4) Cytisine placebo + NRT. All  
379 participants will receive evidence-based counseling for alcohol and tobacco use at baseline. Study  
380 medication will be provided by trained physicians, who will instruct participants in proper medication  
381 administration and adherence.

382 Study medications will be obtained directly from the drug manufacturer - and delivered to the study  
383 pharmacist at PSMU. Dosing will follow standard recommendations. Placebo medications will not contain  
384 active ingredients. The placebo and active study medications will be indistinguishable by appearance and  
385 taste.

- 386 • Cytisine will be purchased from Katren in St. Petersburg, which serves as the distributor of  
387 medications to hospitals and pharmacies. Cytisine will be delivered to Bios Pharmaceuticals to be  
388 encapsulated with riboflavin, the biologic adherence measure. The procedure will be the same for  
389 the cytisine placebo, which will be composed of lactose and also contain riboflavin. Medication will  
390 be packaged in identical snap-top bottles, with each bottle containing 34 capsules.
- 391 • Varenicline will be purchased from Katren in St. Petersburg, which serves as the distributor of  
392 medications to hospitals and pharmacies. Varenicline will be delivered to Bios Pharmaceuticals to  
393 be encapsulated with riboflavin, the biologic adherence measure. The procedure will be the same  
394 for the varenicline placebo, which will be composed of lactose and will also contain riboflavin.  
395 Medication will be packaged in identical snap-top bottles, with each bottle containing either 11,  
396 14, 28, or 56 capsules. Bottles with 11 capsules will contain pills of 0.5mg to be taken during week  
397 1. These bottles will have a different color cap to distinguish them from bottles containing 14, 28  
398 or 56 capsules. Bottles of 14, 28, and 56 capsules will contain pills of 1mg to be taken for the  
399 duration of treatment.
- 400 • NRT mouth spray will be purchased from Katren in St. Petersburg, which serves as the distributor  
401 of medications to hospitals and pharmacies. NRT mouth spray will be delivered to Vertex  
402 Pharmaceuticals for repackaging. An identical placebo will be manufactured by Vertex. Placebo  
403 solution contains propylene glycol, anhydrous ethanol, trometamol, glycerol, sodium hydrogen  
404 carbonate, levomenthol, mint flavour, cooling, flavour, sucralose, acesulfame potassium,  
405 hydrochloric acid and purified water. The taste and the smell of placebo will be identical to NRT  
406 mouth spray. NRT and placebo mouth spray consists of a small bottle (30 ml) of solution held in a  
407 dispenser with a mechanical spray pump. Each dispenser contains approximately 300 sprays.

408 Medication bottles will also be labeled. The medication labels will contain the following information:

409 FOR CLINICAL TRIAL USE ONLY

410 DRUG NAME (Nicotine or Placebo spray)

411 (Varenicline or Placebo capsules)

412 (Cytisine or Placebo capsules)

413 STORE 15-25°C

414 USE BY dd/mm/yyyy

415 KEEP OUT OF REACH OF CHILDREN

416 The Food and Drug Administration (FDA) has indicated that an Investigational New Drug (IND) is not  
417 needed because the study is being conducted outside the United States.

### 419 3.3.A VARENICLINE + NRT PLACEBO

421 Participants randomized to this group will receive active varenicline for 12 weeks and NRT placebo  
422 mouth spray for 8 weeks. Medication dosing will follow recommended standards.

423 **Varenicline (Chantix):** Participants will be asked to take the study medication at the same time they  
424 take their non-study medication. If the patient is not on any non-study medication, they will be asked to  
425 simply take the study medication at the same time each day. Varenicline should be taken with a full glass  
426 of water. Participants will set a date to stop smoking one week from the baseline visit, and Varenicline  
427 dosing will start on the day of the baseline visit. Active varenicline will follow recommended dosing: we  
428 will begin at .5 mg for men and women (one pill on days 1-3 and two pills per day [morning and evening]  
429 on days 4-7) with a target dose of 1 mg twice daily during weeks 2-12.

430 Participants will be informed that when they try to quit smoking, with or without varenicline, they may  
431 have symptoms that may be due to nicotine withdrawal, including: urge to smoke, depressed mood,  
432 trouble sleeping, irritability, frustration, anger, feeling anxious, difficulty concentrating, restlessness,  
433 decreased heart rate, increased appetite, weight gain. Some people have even experienced suicidal  
434 thoughts when trying to quit smoking without medication. Sometimes quitting smoking can lead to  
435 worsening of mental health problems that are already present, such as depression.

436 Some people have had serious side effects while taking varenicline to help them quit smoking, including:  
437 new or worse mental health problems, such as changes in behavior or thinking, aggression, hostility,  
438 agitation, depressed mood, or suicidal thoughts or actions. Some people had these symptoms when they  
439 began taking varenicline, and others developed them after several weeks of treatment, or after stopping  
440 varenicline. These symptoms happened more often in people who had a history of mental health  
441 problems before taking varenicline, than in people without a history of mental health problems. In many  
442 people, these symptoms went away after stopping varenicline, but in some people symptoms continued  
443 after stopping varenicline. Participants will be instructed to use caution when driving or operating  
444 machinery until they know how varenicline affects them. Varenicline may make participants feel sleepy,  
445 dizzy, or have trouble concentrating, making it hard to drive or perform other activities safely.  
446 Participants will be instructed to decrease the amount of alcoholic beverages that they drink during  
447 treatment with varenicline until they know if varenicline affects their ability to tolerate alcohol. Some  
448 people have experienced the following when drinking alcohol during treatment with varenicline:  
449 increased drunkenness (intoxication), unusual or sometimes aggressive behavior, no memory of things  
450 that have happened. However, varenicline has been studied in people who drink, and may actually help  
451 reduce alcohol intake.

452 Serious side effects of varenicline may include:

453 Seizures - some people have had seizures during treatment with varenicline. In most cases, the seizures  
454 have happened during the first month of treatment with varenicline.

455 New or worse heart or blood vessel (cardiovascular) problems, mostly in people, who already have  
456 cardiovascular problems.

457 Sleepwalking can happen with varenicline, and can sometimes lead to behavior that is harmful to  
458 participants or other people, or to property.



459 Allergic reactions can happen with varenicline. Some of these allergic reactions can be life-threatening.  
460 Serious skin reactions, including rash, swelling, redness, and peeling of the skin. Some of these skin  
461 reactions can become life-threatening.

462 In order to help prevent these adverse effects, participants will be instructed not to take more medication  
463 than what is provided by the study. Study clinicians will also be monitoring for signs of varenicline  
464 overdose. These adverse effects are not expected to be likely.

465 If baseline creatinine levels are indicative of reduced kidney function (< 30 cc/min), study investigators  
466 will reduce the dose of varenicline by 50%, which is the action recommended on the medication  
467 packaging and also reflects good clinical practice. Typically this dose reduction results in a total of 1.0  
468 mg/day for those with seriously reduced renal function who are not on dialysis, and a total of 0.5 mg/day  
469 for those who are on dialysis.

470 **NRT mouth spray placebo:** Placebo NRT mouth spray will be identical in appearance and sensation to  
471 the active spray. Participants will be instructed to use enough placebo spray to control cravings. They will  
472 be asked to use one spray first when they would normally smoke a cigarette or have cravings to smoke. If  
473 cravings do not disappear within a few minutes, they will be asked to use a second spray. If 2 sprays are  
474 required to control cravings, future doses may be delivered as 2 consecutive sprays. Most smokers will  
475 require 1 - 2 sprays every 30 minutes to 1 hour. Participants will be instructed not to use more than 2  
476 sprays per dose or 4 sprays every hour and will be asked not to use more than 64 sprays per day – this is  
477 equivalent to 4 sprays per hour for 16 hours. Study team will recommend that participants use at least 8  
478 sprays per day (every 2 hours while awake) as a minimum. After 4 weeks, participants will be instructed  
479 to use the spray as much as they need within the recommended dosing. Participants may vary in how  
480 quickly they taper down, but will be instructed to keep using the spray everyday as much as is required  
481 to avoid smoking. Participants will be instructed to use the spray for 8 weeks.

482 All participants will receive a demonstration on proper use of the mouth spray. Participants will be asked  
483 to take care not to spray their eyes while administering the spray. To use, participants will be instructed  
484 to point the spray nozzle toward their open mouth and hold it as close to their mouth as possible.  
485 Participants will press the top of the dispenser to release one spray into their mouth and will be  
486 instructed not to inhale while spraying to avoid getting spray down their throat and asked not to swallow  
487 for a few seconds after spraying. Participants will be asked not to eat or drink when administering the  
488 mouth spray.

489 Participants may experience unwanted effects because by stopping smoking they have reduced the  
490 amount of nicotine they are taking. These effects include: irritability or aggression; impatient or  
491 frustrated; feeling low; anxiety; restlessness; poor concentration; increased appetite or weight gain;  
492 urges to smoke (craving); night time awakening or sleep disturbance; lowering of heart rate;  
493 constipation; bleeding gums; dizziness or light-headedness; sore throat, stuffy or runny nose; mouth  
494 ulcers, cough and/or symptoms of a common cold.

### 3.3.B. VARENICLINE PLACEBO + NRT

497 Participants randomized to this group will receive a varenicline placebo for 12 weeks and an active NRT  
498 mouth spray for 8 weeks. Medication dosing will follow recommended standards.

499 **Varenicline placebo:** As with active varenicline, placebo varenicline administration will follow  
500 recommended dosing: we will begin at one pill on days 1-3 and two pills per day starting on day 4.  
501 Participants will be asked to take their assigned pills at the same time they take their non-study  
502 medication. If the patient is not on any non-study medication, they will be asked to simply take the study  
503 medication at the same time each day. Participants will be instructed to take their pills with a full glass of  
504 water. Participants will set a date to stop smoking one week from the baseline visit, and dosing of the  
505 assigned intervention will start on the day of the baseline visit.

506 If baseline creatinine levels are indicative of reduced kidney function (< 30 cc/min), study investigators  
507 will reduce the dose of varenicline placebo, which is the action recommended on the medication  
508 packaging and also reflects good clinical practice. Typically this dose reduction results in a total of 1.0  
509 mg/day for those with seriously reduced renal function who are not on dialysis, and a total of 0.5 mg/day  
510 for those who are on dialysis.

511 **NRT mouth spray:** The NRT mouth spray will contain 1 mg of nicotine per spray. Participants will be  
512 instructed to use enough nicotine spray to control cravings. They will be asked to use one spray first  
513 when they would normally smoke a cigarette or have cravings to smoke. If cravings do not disappear  
514 within a few minutes, they will be asked to use a second spray. If 2 sprays are required to control  
515 cravings, future doses may be delivered as 2 consecutive sprays. Most smokers will require 1 - 2 sprays  
516 every 30 minutes to 1 hour. Participants will be instructed not to use more than 2 sprays per dose or 4  
517 sprays every hour and will be asked not to use more than 64 sprays per day – this is equivalent to 4  
518 sprays per hour for 16 hours. Study team will recommend that participants use at least 8 sprays per day  
519 (every 2 hours while awake) as a minimum. After 4 weeks, participants will be instructed to use the  
520 spray as much as they need within the recommended dosing. Participants may vary in how quickly they  
521 taper down, but will be instructed to keep using the spray everyday as much as is required to avoid  
522 smoking. Participants will be instructed to use the spray for 8 weeks.

523 All participants will receive a demonstration on proper use of the mouth spray. Participants will be asked  
524 to take care not to spray their eyes while administering the spray. To use, participants will be instructed  
525 to point the spray nozzle toward their open mouth and hold it as close to their mouth as possible.  
526 Participants will press the top of the dispenser to release one spray into their mouth and will be  
527 instructed not to inhale while spraying to avoid getting spray down their throat and asked not to swallow  
528 for a few seconds after spraying. Participants will be asked not to eat or drink when administering the  
529 mouth spray.

530 **Possible Untoward Effects, Their Symptoms & Treatment:** Like all medicines, NRT mouth spray can have  
531 side-effects. As many of the effects are due to nicotine, they can also occur when nicotine is obtained by  
532 smoking.

533 Participants may experience unwanted effects because by stopping smoking they have reduced the  
534 amount of nicotine they are taking. Participants may also experience these effects if they underuse the  
535 spray before they are ready to reduce their nicotine intake. These effects include: irritability or



536 aggression; impatient or frustrated; feeling low; anxiety; restlessness; poor concentration; increased  
537 appetite or weight gain; urges to smoke (craving); night time awakening or sleep disturbance; lowering  
538 of heart rate; constipation; bleeding gums; dizziness or light-headedness; sore throat, stuffy or runny  
539 nose; mouth ulcers, cough and/or symptoms of a common cold.

540 Participants will be asked to stop using the spray and seek medical attention if they notice any of the  
541 following allergic reactions: swelling of the mouth, lips, throat and tongue, itching of the skin, swelling of  
542 the skin, ulceration and inflammation of the lining of the mouth.

543 Very common side-effects (may affect more than 1 in 10 people): hiccups (these are particularly  
544 common); throat irritation; headache; feeling sick (nausea); cough

545 Common side-effects (may affect up to 1 in 10 people): allergic reactions (hypersensitivity); burning  
546 sensation in the mouth; dizziness; taste disturbance or loss of taste; tingling or numbness of the hands  
547 and feet; toothache; stomach pain or discomfort; excessive gas or wind; vomiting; dry mouth; indigestion;  
548 diarrhea; tiredness (fatigue); sore and inflamed mouth; increased salivation

549 Uncommon side-effects (may affect up to 1 in 100 people): abnormal dreams; palpitations; fast heart  
550 rate/beat; sudden reddening of the face and/ or neck; high blood pressure; sudden constriction of the  
551 small airways of the lung that can cause wheezing and shortness of breath; shortness of breath; loss or  
552 damage to voice; throat tightness; burping (belching); swollen red sore tongue; mouth ulcers or blisters;  
553 numbness or tingling of the mouth; excessive sweating; itching; rash; hives (urticaria); unusual  
554 weakness; chest discomfort and pain; jaw muscle ache; general feeling of discomfort or being unwell or  
555 out of sorts (malaise); dry skin; muscle and bone pain; mouth and throat pain; sneezing; runny nose;  
556 blocked nose; inflammation of the gums.

557 Rare side-effects (may affect up to 1 in 1,000 people): difficulty in swallowing; decreased feeling of  
558 sensitivity especially in the mouth; feeling or wanting to be sick (vomit).

559 Other side-effects can include: abnormal beating of the heart; serious allergic reactions which cause  
560 difficulty in breathing or dizziness; swelling of the face or throat; blurred vision; watery eyes; dry throat;  
561 lip pain; stomach discomfort; redness of the skin; muscle tightness.

562 Clinicians will also be monitoring for signs of nicotine overdose. These adverse effects are not expected to  
563 be likely, as symptoms of nicotine overdose are extremely rare when using mouth spray as directed.

### 564 3.3.C. CYTISINE + NRT PLACEBO

565

566 Participants randomized to this group will receive active cytisine for 25 days and an NRT placebo mouth  
567 spray for 8 weeks. Medication dosing will follow recommended standards.

568 **Cytisine (Tabex):** Cytisine will be administered perorally according to the following schedule:

569 First 3 days: 1 tablet (1.5 mg) 6 times daily (every 2 hours, up to six tablets per day) with a parallel  
570 reduction of the number of cigarettes smoked.

571 4th to 12th day: 1 tablet every 2 1/2 hours (5 tablets daily)

572 13th to 16th day: 1 tablet every 3 hours (4 tablets daily)

573 17th to 20th day: 1 tablet every 5 hours (3 tablets daily)

574 21st to 25th day: 1 to 2 tablets daily

575 The following adverse effects are rather often observed at the beginning of cytisine treatment: changes in  
576 both taste and appetite, dryness in the mouth, headache, irritability, nausea, constipation, tachycardia,  
577 light elevation of the arterial pressure. The majority of the adverse effects can abate in the course of the  
578 treatment. In order to help prevent these adverse effects, participants will be instructed not to take more  
579 medication than what is provided by the study. Study clinicians will also be monitoring for signs of  
580 cytisine overdose. These adverse effects are not expected to be likely.

581 **NRT mouth spray placebo:** Placebo NRT mouth spray will be identical in appearance and sensation to  
582 the active spray. Participants will be instructed to use enough placebo spray to control cravings. They will  
583 be asked to use one spray first when they would normally smoke a cigarette or have cravings to smoke. If  
584 cravings do not disappear within a few minutes, they will be asked to use a second spray. If 2 sprays are  
585 required to control cravings, future doses may be delivered as 2 consecutive sprays. Most smokers will  
586 require 1 - 2 sprays every 30 minutes to 1 hour. Participants will be instructed not to use more than 2  
587 sprays per dose or 4 sprays every hour and will be asked not to use more than 64 sprays per day – this is  
588 equivalent to 4 sprays per hour for 16 hours. Study team will recommend that participants use at least 8  
589 sprays per day (every 2 hours while awake) as a minimum. After 4 weeks, participants will be instructed  
590 to use the spray as much as they need within the recommended dosing. Participants may vary in how  
591 quickly they taper down, but will be instructed to keep using the spray everyday as much as is required  
592 to avoid smoking. Participants will be instructed to use the spray for 8 weeks.

593 All participants will receive a demonstration on proper use of the mouth spray. Participants will be asked  
594 to take care not to spray their eyes while administering the spray. To use, participants will be instructed  
595 to point the spray nozzle toward their open mouth and hold it as close to their mouth as possible.  
596 Participants will press the top of the dispenser to release one spray into their mouth and will be  
597 instructed not to inhale while spraying to avoid getting spray down their throat and asked not to swallow  
598 for a few seconds after spraying. Participants will be asked not to eat or drink when administering the  
599 mouth spray.

600 Participants may experience unwanted effects because by stopping smoking they have reduced the  
601 amount of nicotine they are taking. These effects include: irritability or aggression; impatient or  
602 frustrated; feeling low; anxiety; restlessness; poor concentration; increased appetite or weight gain;  
603 urges to smoke (craving); night time awakening or sleep disturbance; lowering of heart rate;  
604 constipation; bleeding gums; dizziness or light-headedness; sore throat, stuffy or runny nose; mouth  
605 ulcers, cough and/or symptoms of a common cold.

### 606 3.3.D. CYTISINE PLACEBO + NRT

607 Participants randomized to this group will receive cytisine placebo for 25 days and an active NRT mouth  
608 spray for 8 weeks. Medication dosing will follow recommended standards.

609 **Cytisine (Tabex) placebo:** As with the active medication, Cytisine placebo will be administered  
610 perorally according to the following schedule:

611 First 3 days: 1 tablet 6 times daily (every 2 hours, up to six tablets per day) with a parallel reduction of  
612 the number of cigarettes smoked.

613 4th to 12th day: 1 tablet every 2 1/2 hours (5 tablets daily)

614 13th to 16th day: 1 tablet every 3 hours (4 tablets daily)

615 17th to 20th day: 1 tablet every 5 hours (3 tablets daily)

616 21st to 25th day: 1 to 2 tablets daily

617 **NRT mouth spray:** The NRT mouth spray will contain 1 mg of nicotine per spray. Participants will be  
618 instructed to use enough nicotine spray to control cravings. They will be asked to use one spray first  
619 when they would normally smoke a cigarette or have cravings to smoke. If cravings do not disappear  
620 within a few minutes, they will be asked to use a second spray. If 2 sprays are required to control  
621 cravings, future doses may be delivered as 2 consecutive sprays. Most smokers will require 1 - 2 sprays  
622 every 30 minutes to 1 hour. Participants will be instructed not to use more than 2 sprays per dose or 4  
623 sprays every hour and will be asked not to use more than 64 sprays per day – this is equivalent to 4  
624 sprays per hour for 16 hours. Study team will recommend that participants use at least 8 sprays per day  
625 (every 2 hours while awake) as a minimum. After 4 weeks, participants will be instructed to use the spray  
626 as much as they need within the recommended dosing. Participants may vary in how quickly they taper  
627 down, but will be instructed to keep using the spray everyday as much as is required to avoid smoking.  
628 Participants will be instructed to use the spray for 8 weeks.

629 All participants will receive a demonstration on proper use of the mouth spray. Participants will be asked  
630 to take care not to spray their eyes while administering the spray. To use, participants will be instructed  
631 to point the spray nozzle toward their open mouth and hold it as close to their mouth as possible.  
632 Participants will press the top of the dispenser to release one spray into their mouth and will be  
633 instructed not to inhale while spraying to avoid getting spray down their throat and asked not to swallow  
634 for a few seconds after spraying. Participants will be asked not to eat or drink when administering the  
635 mouth spray.

636 Possible Untoward Effects, Their Symptoms & Treatment: Like all medicines, NRT mouth spray can have  
637 side-effects. As many of the effects are due to nicotine, they can also occur when nicotine is obtained by  
638 smoking.

639 Participants may experience unwanted effects because by stopping smoking they have reduced the  
640 amount of nicotine they are taking. Participants may also experience these effects if they underuse the  
641 spray before they are ready to reduce their nicotine intake. These effects include: irritability or  
642 aggression; impatient or frustrated; feeling low; anxiety; restlessness; poor concentration; increased  
643 appetite or weight gain; urges to smoke (craving); night time awakening or sleep disturbance; lowering  
644 of heart rate; constipation; bleeding gums; dizziness or light-headedness; sore throat, stuffy or runny  
645 nose; mouth ulcers, cough and/or symptoms of a common cold.

646 Participants will be asked to stop using the spray and seek medical attention if they notice any of the  
647 following allergic reactions: swelling of the mouth, lips, throat and tongue, itching of the skin, swelling of  
648 the skin, ulceration and inflammation of the lining of the mouth.

649 Very common side-effects (may affect more than 1 in 10 people): hiccups (these are particularly  
650 common); throat irritation; headache; feeling sick (nausea); cough.

651 Common side-effects (may affect up to 1 in 10 people): allergic reactions (hypersensitivity); burning  
652 sensation in the mouth; dizziness; taste disturbance or loss of taste; tingling or numbness of the hands  
653 and feet; toothache; stomach pain or discomfort; excessive gas or wind; vomiting; dry mouth; indigestion;  
654 diarrhea; tiredness (fatigue); sore and inflamed mouth; increased salivation.

655 Uncommon side-effects (may affect up to 1 in 100 people): abnormal dreams; palpitations; fast heart  
656 rate/beat; sudden reddening of the face and/ or neck; high blood pressure; sudden constriction of the  
657 small airways of the lung that can cause wheezing and shortness of breath; shortness of breath; loss or  
658 damage to voice; throat tightness; burping (belching); swollen red sore tongue; mouth ulcers or blisters;  
659 numbness or tingling of the mouth; excessive sweating; itching; rash; hives (urticaria); unusual  
660 weakness; chest discomfort and pain; jaw muscle ache; general feeling of discomfort or being unwell or  
661 out of sorts (malaise); dry skin; muscle and bone pain; mouth and throat pain; sneezing; runny nose;  
662 blocked nose; inflammation of the gums.

663 Rare side-effects (may affect up to 1 in 1,000 people): difficulty in swallowing; decreased feeling of  
664 sensitivity especially in the mouth; feeling or wanting to be sick (vomit).

665 Other side-effects can include: abnormal beating of the heart; serious allergic reactions which cause  
666 difficulty in breathing or dizziness; swelling of the face or throat; blurred vision; watery eyes; dry throat;  
667 lip pain; stomach discomfort; redness of the skin; muscle tightness.

668 Clinicians will also be monitoring for signs of nicotine overdose. These adverse effects are not expected to  
669 be likely, as symptoms of nicotine overdose are extremely rare when using mouth spray as directed.

### 671 3.3.E. BEHAVIORAL COUNSELING

672  
673 Participants in all study arms will receive brief (5 minute) evidence-based counseling for alcohol and  
674 tobacco use at baseline according to the following established guidelines:

675 **Alcohol:** National Institute on Alcohol Abuse and Alcoholism. A Pocket Guide for Alcohol Screening and  
676 Brief Intervention: Updated 2005 Edition. Rockville, MD: National Institutes of Health; 2007.<sup>32</sup>

677 **Tobacco:** Agency for Healthcare Research and Quality. Five major steps to intervention (the "5 A's").  
678 Available from: [http://www.ahrq.gov/professionals/clinicians-providers/guidelines-](http://www.ahrq.gov/professionals/clinicians-providers/guidelines-recommendations/tobacco/5steps.html)  
679 [recommendations/tobacco/5steps.html](http://www.ahrq.gov/professionals/clinicians-providers/guidelines-recommendations/tobacco/5steps.html).<sup>33</sup>

680 **Alcohol Counseling:**

681 The counseling approach for the trial will be adapted from the NIAAA Clinician’s Guide as follows:

| NIAAA Clinician’s Guide                                                                                            | St. PETER                                                                                      |
|--------------------------------------------------------------------------------------------------------------------|------------------------------------------------------------------------------------------------|
| Step 1: Ask about alcohol use                                                                                      | Alcohol use assessed as part of the research interview; all have risky drinking at enrollment. |
| Step 2: Assess for alcohol use disorders (AUDs)                                                                    | Performed during the research interview.                                                       |
| Step 3: Advise and assist (brief intervention) – described below                                                   |                                                                                                |
| Step 4: At follow-up: Continue support<br>Document alcohol use and review goals<br>Reinforce and support continued | N/A – counseling performed at baseline only                                                    |

682 During the baseline assessment, RAs, who are all trained Russian addiction psychiatrists, will determine  
 683 whether the participant meets DSM-5 criteria for an AUD and whether the AUD is mild, moderate, or  
 684 severe. The RA will then tailor the brief alcohol counseling based on whether the participant has only at-  
 685 risk drinking (all participants at enrollment) or an AUD.

- 686 • For participants who have only **at-risk drinking**, but who do not meet criteria for an alcohol use  
 687 disorder, the RA will state his or her conclusion and recommendation about participant’s alcohol  
 688 use clearly and relate to the patient’s concerns and medical findings, if present:
  - 689 ○ “You’re drinking more than is medically safe.”
  - 690 ○ “I strongly recommend that you cut down (or quit) and I’m willing to help.”
  - 691 ○ The RA will gauge participant’s readiness to change drinking habits by asking, “Are you  
 692 willing to consider making changes in your drinking?” and responding accordingly.

| No                                                                                                                                                                                                                                                                                                                                                                                                                                                                                                                                                                       | Yes                                                                                                                                                                                                                                                                                                                                                                                                                                                                                                                                                                                                                     |
|--------------------------------------------------------------------------------------------------------------------------------------------------------------------------------------------------------------------------------------------------------------------------------------------------------------------------------------------------------------------------------------------------------------------------------------------------------------------------------------------------------------------------------------------------------------------------|-------------------------------------------------------------------------------------------------------------------------------------------------------------------------------------------------------------------------------------------------------------------------------------------------------------------------------------------------------------------------------------------------------------------------------------------------------------------------------------------------------------------------------------------------------------------------------------------------------------------------|
| <p>Don’t be discouraged—ambivalence is common. Your advice has likely prompted a change in your patient’s thinking, a positive change in itself. With continued reinforcement, your patient may decide to take action. For now,</p> <ul style="list-style-type: none"> <li>• <b>Restate your concern</b> about his or her health.</li> <li>• <b>Encourage reflection</b> by asking patients to weigh what they like about drinking versus their reasons for cutting down. What are the major barriers to change?</li> <li>• <b>Address barriers to change</b></li> </ul> | <p><b>Help set a goal</b> to cut down to within maximum limits or abstain for a time.<br/> <b>Agree on a plan</b>, including</p> <ul style="list-style-type: none"> <li>• what specific steps the patient will take (e.g., not go to a bar after work, measure all drinks at home, alternate alcoholic and nonalcoholic beverages).</li> <li>• how drinking will be tracked (diary, kitchen calendar).</li> <li>• how the patient will manage high-risk situations.</li> <li>• who might be willing to help, such as significant others or nondrinking friends.</li> </ul> <p><b>Provide educational materials.</b></p> |

693

- 694 • For participants who meet criteria for an **AUD**, the RA will state his or her conclusion and  
695 recommendation clearly and relate to the patient’s concerns and medical findings if present.
  - 696 ○ “I believe that you have an alcohol use disorder. I strongly recommend that you quit  
697 drinking and I’m willing to help.”
- 698 • The RA will negotiate a drinking goal (abstaining is the safest course for most patients with an  
699 alcohol use disorder); and consider recommending a mutual help group.

700 **Tobacco Counseling:**

701 Tobacco counseling is based off the Agency for Healthcare Research and Quality “Five major steps to  
702 intervention (the “5 A’s”). The 5 A’s are ask, advise, assess, assist, and arrange. Similar to the alcohol use  
703 counseling, these steps will be covered in the baseline assessment. Everyone is asked about tobacco use  
704 (step 1) and as all study participants will smoke at least an average of 5 cigarettes/day, all participants  
705 will be advised to quit tobacco (step 2). This advice should be clear, strong, and personalized.

706 Following advising participants to quit tobacco use, research assessors will assist participants in  
707 determining a quit plan. Strategies for implementing a quit plan include, setting a Target Quit Date (TQD).  
708 It is important to tell family, friends, and coworkers about quitting. It is also important to request  
709 understanding and support from them, to anticipate challenges to the upcoming quit attempt, and to  
710 remove tobacco products from the environment. Participants will be expected to set the TQD 1 week  
711 from the baseline assessment and should plan for abrupt smoking cessation on their target quit date.  
712 Study medication administration will begin on the day of their baseline visit (7 days before their quit  
713 date).

714 If the participant is at first unwilling to make a quit attempt, advise the participant that he/she agreed to  
715 follow study procedures and protocols earlier, and all participants in the study have agreed to reduce  
716 their alcohol and/or tobacco and accept study medications. Encourage all participants by reminding them  
717 that even taking small steps by using medications to eliminate tobacco use is a step in the right direction.  
718 These small steps can take the form of a “practice” quit attempt, which is identical to the TQD noted  
719 above, but which evidence shows may be interpreted by smokers as less formidable if it is considered  
720 “practice.”<sup>34</sup> Evidence also shows that abrupt quitting, rather than gradual reduction, results in higher  
721 quit rates.<sup>35</sup>

722 Participants will be advised to let their primary care physician know that they are making a quit attempt.

723 Participants will be reminded that all medications in the study reduce withdrawal symptoms.

724 Participants will be provided with written material on the benefit of reducing/quitting both alcohol and  
725 tobacco.

726 Participants will be provided with the following recommendations:

- 727 1. On enrollment day, reduce cigarettes per day by half. For example, if someone is smoking 20 cpd, they  
728 should reduce to 10 cpd on the day they start medication.

729 2. Over the remainder of the first week, reduce at participants' own pace to zero by Target Quit Day  
730 (TQD--1 week after enrollment). For example, reduce from 10 cpd to zero over days 2-7.

### 731 3.4 MEDICATION CONSIDERATIONS

732  
733 If reductions in medication are required, the following approach will be taken for each study drug:

734 For participants randomized to Varenicline/Varenicline placebo, reduce to 1 pill per day (instead of 1 pill  
735 twice daily).

736 For participants randomized to Cytisine/Cytisine placebo, reduce the dose by ½.

737 For mouth spray, reduce use to a level with which participants are comfortable and a dose that they can  
738 tolerate.

#### 739 3.4.A SYMPTOM MONITORING

740  
741 The study staff (research clinicians [addiction physicians with extensive experience performing  
742 pharmacotherapy trials]) will provide participants with the correct medication packages and advice on  
743 how to take the pills and utilize the mouth spray. The staff will be trained to assess for adverse  
744 medication effects and will follow established protocols for identifying and monitoring any ongoing  
745 adverse events, including referral to treatment as appropriate. Study participants will be actively  
746 monitored for adverse events, particularly those related to varenicline in the most recent FDA's Drug  
747 Safety Announcement. Symptoms will be assessed weekly for the first month (and monitored more  
748 frequently, if necessary) and biweekly thereafter by trained clinical staff, while the participants are  
749 administered study medications. Medication side effects will be monitored through a medication side  
750 effect checklist adapted from Lerman et al.'s (2015) "Use of the nicotine metabolite ratio as a genetically  
751 informed biomarker of response to nicotine patch or varenicline for smoking cessation: a randomised,  
752 double-blind placebo-controlled trial" study published in *The Lancet Respiratory Medicine*.<sup>36</sup> It should be  
753 noted that this symptom checklist reflects a highly conservative approach, since many of the symptoms  
754 on the checklist were found to be *unrelated* to varenicline or nicotine replacement in a recent 8,000  
755 person trial, EAGLES, that was mandated by the FDA (*Lancet*, Anthenelli et al, 2015).<sup>37</sup>

#### 757 3.4.B. ADHERENCE

758  
759 Medication adherence will be assessed at each study visit using the direct (Riboflavin) and indirect (pill  
760 counts and self-report) measures.

#### 761 **Direct Adherence Measures**

762 Riboflavin (50 mg), a vitamin yielding a change in urine color, will be added to both active and placebo  
763 capsules. Participants will be informed that the color change is harmless. At this dose, Riboflavin is



764 expected to remain in the system at detectable levels for up to 24 hours. At each study visit post-baseline  
765 (while taking study medication), participants will be asked to provide a urine sample which will be  
766 visually inspected for the presence or absence of Riboflavin in a room with low ambient light, using  
767 ultraviolet (UV) light at the long wave setting (33 nm).

## 768 **Indirect Adherence Measures**

### 769 *Pill Counts*

770 Participants will be instructed to bring any unused medication to each study visit post-baseline. The RA  
771 will count and record the number of remaining pills. The data management team will extrapolate the  
772 amount of medication taken and determine the measure of adherence.

### 773 *Self-Report*

774 Medication adherence will also be measured through self-report using the modified Adult AIDS Clinical  
775 Trial Group (AACTG) ART adherence questions.

## 776 **Adherence Aids**

777 During each study visit medication instructions will be reviewed and strategies for adherence discussed  
778 with each participant. Adherence plans will be individually tailored to each participant, depending on his  
779 or her reason for non-adherence. To further increase medication adherence, an automated text message  
780 will be sent daily (on week days), with the option for participants to reduce text messages to twice per  
781 week (Tuesday and Friday), reminding participants to take their study medication.

782 The message will read: Пожалуйста, принимайте препарат исследования регулярно

783 Translation: Please take study medication regularly

784  
785 Participants will be able to reduce the frequency to 2 days per week or opt out of text message reminders  
786 entirely at any time throughout the study.

787  
788 Participants will also be encouraged to set a reminder in their phone to take the study medication each  
789 day.

## 791 **3.4.C. MEDICATION DISBURSEMENT**

792  
793 Medication inserts will be provided to participants at baseline.

794 Medication distribution will be as follows:

### 795 **Varenicline and Varenicline Placebo:**

796 The following medication bottles will be prepared for study participants by the study pharmacist:

- 797  
798 1. 1 bottle of 11 capsules that are 0.5mg to be taken during week 1. This bottle will have a cap of a  
799 different color to distinguish it from the rest of the bottles.



- 800 2. 1 bottle of 14 capsules that are 1 mg  
801 3. 1 bottle of 28 capsules that are 1mg  
802 4. 1 bottle of 56 capsules that are 1mg  
803 5. 1 bottle of 56 capsules that are 1mg  
804 (bottles 4 and 5 are the same)

805 At baseline, participants would get bottles 1, 2, and 3. This would be a one-month supply of  
806 medication. At 2-week visit, participants would get one bottle of medication, bottle 4 (one-month  
807 supply). At 1-month visit, participants would get the remaining bottle 5 (one-month supply).

### 808 **Cytisine and Cytisine Placebo**

- 809 • 34 capsules/bottle
- 810 • Participants will receive the entire supply of Cytisine medication at the baseline study visit (3  
811 bottles).

### 812 **NRT and NRT Placebo**

813 Each bottle of NRT mouth spray (active and placebo) will contain 300 doses of NRT. We estimate that  
814 most participants will require 5 bottles of spray for the duration of the study to be distributed according  
815 to the following schedule:

816 At baseline, participants will receive 3 bottles of study spray and at 2-weeks, they will receive the  
817 remaining 2 bottles of the study spray.

818 Dosing will depend on participant cravings, thus some participants may require additional study spray  
819 bottles throughout the study. For participants that require additional spray bottles, boxes with active  
820 spray and placebo will be provided to the study team. The boxes will be labeled with a code known only  
821 to the pharmacist. In the event that additional bottles of spray are needed, the research assessor will  
822 contact the pharmacist and provide her with the participant's ID, based on the participant's study ID, the  
823 pharmacist will be able to indicate which labeled box to use to dispense the extra spray. The same  
824 approach will be taken should participants require extra study capsules.

#### 825 3.4.D. LOST OR STOLEN STUDY MEDICATION

826  
827 If participants report lost or stolen medication, they will be provided with extra study medication. If  
828 participants report losing medication more than once, the study team will be alerted and the case  
829 discussed to determine a plan of action.

#### 831 3.4.E. DISCONTINUATION OF STUDY MEDICATION

833 Despite known side effects of partial agonists (nausea being the most common), most people taking these  
 834 medications do not discontinue them due to side effects. Before medication is discontinued it is  
 835 important to encourage participants to take medication with a full glass of water and food. This usually  
 836 reduces medication side effects. Those who discontinue medication will be followed and analyzed by  
 837 intention to treat.

838 Participants found to be pregnant during the study will have their study medication discontinued, but  
 839 will still be followed-up for the duration of the study. Participants who report pregnancy outside of study  
 840 visits will be instructed to immediately discontinue their study medication and requested to come in for a  
 841 confirmatory urine pregnancy test.

842 **3.5 SCHEDULE OF DATA COLLECTION**

|                              |                                                            | Pre-screen | Screener and Baseline Visit |           | 1 week call | 2 week visit | 3 wk call | 1 mo visit | Calls wks 6 and 10 | 2 mo visit | 3 mo visit | 6 mo visit | 12 mo visit |
|------------------------------|------------------------------------------------------------|------------|-----------------------------|-----------|-------------|--------------|-----------|------------|--------------------|------------|------------|------------|-------------|
|                              |                                                            |            | Screener                    | Base line |             |              |           |            |                    |            |            |            |             |
| Screening                    | Screening Questions                                        | X          | X                           |           |             |              |           |            |                    |            |            |            |             |
|                              | Verification of HIV and non-pregnancy, BAC and BP measures |            | X                           |           |             |              |           |            |                    |            |            |            |             |
| Enrollment                   | Sign Informed Consent                                      |            | X                           |           |             |              |           |            |                    |            |            |            |             |
|                              | Complete contact information/verify numbers                |            |                             | X         |             |              |           |            |                    |            |            |            |             |
|                              | Randomization                                              |            |                             | X         |             |              |           |            |                    |            |            |            |             |
| Laboratory                   | Clinical Values                                            |            |                             | X         |             |              |           | X          |                    |            | X          | X          | X           |
|                              | BAC and CO Monitoring                                      |            |                             | X         |             |              |           | X          |                    |            | X          | X          | X           |
|                              | Pregnancy Test                                             |            | X                           |           |             | X            |           | X          |                    | X          | X          |            |             |
|                              | Urine Nicotine metabolite testing                          |            |                             | X         |             |              |           |            |                    |            | X          |            |             |
|                              | Purple1: Hemoglobin                                        |            |                             | X         |             |              |           |            |                    |            | X          |            |             |
|                              | Purple1: Platelets                                         |            |                             | X         |             |              |           |            |                    |            | X          |            |             |
|                              | Purple1: HIV RNA                                           |            |                             | X         |             |              |           |            |                    |            | X          |            |             |
|                              | Purple1: DBS                                               |            |                             | X         |             |              |           | X          |                    |            | X          |            |             |
|                              | Purple1: Plasma                                            |            |                             | X         |             |              |           | X          |                    |            | X          | X          | X           |
|                              | Green: CD4                                                 |            |                             | X         |             |              |           |            |                    |            | X          |            |             |
|                              | Red1: HS CRP                                               |            |                             | X         |             |              |           |            |                    |            | X          |            |             |
|                              | Red1: Cholesterol                                          |            |                             | X         |             |              |           |            |                    |            | X          |            |             |
|                              | Red1: eGFR                                                 |            |                             | X         |             |              |           |            |                    |            | X          |            |             |
|                              | Red1: AST/ALT                                              |            |                             | X         |             |              |           |            |                    |            | X          |            |             |
|                              | Red1: HCV Ab                                               |            |                             | X         |             |              |           |            |                    |            | If neg     |            |             |
|                              | Red1: Serum                                                |            |                             | X         |             |              |           | X          |                    |            | X          | X          | X           |
| Purple 2: Whole blood        |                                                            |            | X                           |           |             |              |           |            |                    |            |            |            |             |
| CPT: Heparin plasma and PBMC |                                                            |            | X                           |           |             |              |           |            |                    |            |            |            |             |
| Purple 3: Plasma             |                                                            |            | X                           |           |             |              | X         |            |                    | X          | X          | X          |             |
| Asses                        | Full Study                                                 |            |                             | X         |             |              |           | X          |                    |            | X          | X          | X           |

| sment        | Assessment                        |  |  |   |   |   |   |   |   |   |   |   |   |
|--------------|-----------------------------------|--|--|---|---|---|---|---|---|---|---|---|---|
|              | Adherence only                    |  |  |   | X | X | X |   | X | X |   |   |   |
| Intervention | Symptom Management/Adverse Events |  |  | X | X | X | X | X | X | X | X |   |   |
|              | Provide Medication Instructions   |  |  | X |   | X |   | X |   | X |   |   |   |
|              | Give Study Medication             |  |  | X |   | X |   | X |   |   |   |   |   |
|              | Observe Ingestion                 |  |  | X |   |   |   |   |   |   |   |   |   |
|              | Discuss Adherence                 |  |  | X | X | X | X | X | X | X |   |   |   |
|              | Assess Adherence                  |  |  |   | X | X | X | X | X | X | X |   |   |
|              | Provide Counseling                |  |  | X |   |   |   |   |   |   |   |   |   |
| Other        | Provide Resource Card             |  |  | X |   |   |   |   |   |   |   |   |   |
|              | Compensate for Participation      |  |  | X | X | X | X | X | X | X | X | X | X |
|              | Report Adverse Events             |  |  | X | X | X | X | X | X | X | X | X | X |
|              | Complete Tracking Forms           |  |  | X | X | X | X | X | X | X | X | X | X |

843

844

3.5.A. VISIT WINDOWS

845

1 Week Medication Call

846

- Window open: 5 days post baseline

847

- Target date: 7 days post baseline

848

- Window close: 10 days post baseline

849

- Window length: 5 days

850

2 Week Visit

851

- Window open: 11 days post baseline

852

- Target date: 14 days post baseline

853

- Window close: 20 days post baseline

854

- Window length: 9 days

855

856

3 Week Medication Call

857

- Window open: 18 days post baseline

858

- Target date: 21 days post baseline

859

- Window close: 25 days post baseline

860

- Window length: 7 days

861

862

1 Month Visit

863

- Window open: 25 days post baseline

864

- Target date: 28 days post baseline

865

- Window close: 41 days post baseline

866

- Window length: 16 days

867

- 868 6 Week Medication Call
- 869 • Window open: 38 days post baseline
  - 870 • Target date: 42 days post baseline
  - 871 • Window close: 50 days post baseline
  - 872 • Window length: 12 days

- 873
- 874 2 Month Visit
- 875 • Window open: 49 days post baseline
  - 876 • Target date: 56 days post baseline
  - 877 • Window close: 68 days post baseline
  - 878 • Window length: 19 days

- 879
- 880 10 Week Medication Call
- 881 • Window open: 65 days post baseline
  - 882 • Target date: 70 days post baseline
  - 883 • Window close: 80 days post baseline
  - 884 • Window length: 15 days post

- 885
- 886 3 Month Visit
- 887 • Window open: 78 days post baseline
  - 888 • Target date: 84 days post baseline
  - 889 • Window close: 140 days post baseline
  - 890 • Length: 62 days

- 891
- 892 6 Month Visit
- 893 • Window open: 141 days post baseline
  - 894 • Target date: 180 days post baseline
  - 895 • Window close: 252 days post baseline
  - 896 • Length: 111 days

- 897
- 898 12 Month visit
- 899 • Window open: 253 days post baseline
  - 900 • Target date: 360 days post baseline
  - 901 • Window close: 450 days post baseline
  - 902 • Window length: 197 days

903

904 \*Phone and visit windows may overlap, but RAs will always prioritize visits over phone calls.

905

906 **3.6 DATA SOURCES**

907

3.6.A QUESTIONNAIRES

Questionnaires will be administered at baseline, 1-, 3-, 6-, and 12-month study visits to collect information about participant demographics (e.g., age, gender), general and mental health and health-related behaviors such as substance use.

3.6.B. BLOOD

Blood will be collected at baseline, 1-, 3-, 6-, and 12-month study visits to assess the following:

| Test                                                                        | Timepoint                                  | Fresh/Frozen                                                                                                                                                                                                                                                                          |
|-----------------------------------------------------------------------------|--------------------------------------------|---------------------------------------------------------------------------------------------------------------------------------------------------------------------------------------------------------------------------------------------------------------------------------------|
| <b>Red Tube (9 mL at baseline and 3 months; 6 mL at 1,6, and 12 months)</b> |                                            | Testing on fresh samples; serum stored for future use, including TMAO testing, in 0.5mL aliquots.                                                                                                                                                                                     |
| HS CRP                                                                      | Baseline, 3-months                         |                                                                                                                                                                                                                                                                                       |
| Cholesterol                                                                 | Baseline, 3-months                         |                                                                                                                                                                                                                                                                                       |
| HCV Ab                                                                      | Baseline. 3-months if negative at baseline |                                                                                                                                                                                                                                                                                       |
| eGFR (creatinine)                                                           | Baseline, 3-months                         |                                                                                                                                                                                                                                                                                       |
| AST/ALT                                                                     | Baseline, 3 months                         |                                                                                                                                                                                                                                                                                       |
| Aliquoted Serum                                                             | Baseline, 1, 3, 6, 12-months               |                                                                                                                                                                                                                                                                                       |
| <b>Purple EDTA (6 mL)</b>                                                   |                                            | Testing on fresh samples; plasma stored for future IL-6, oxidative stress, and BNP testing (0 and 3-mo) in 0.5mL aliquots. Samples may also be used for future testing not listed above to study altered coagulation, microbial translocation, hepatic, and cardiometabolic diseases. |
| Hemoglobin                                                                  | Baseline, 3-months                         |                                                                                                                                                                                                                                                                                       |
| Platelets                                                                   | Baseline, 3-months                         |                                                                                                                                                                                                                                                                                       |
| HIV RNA                                                                     | Baseline, 3-months                         |                                                                                                                                                                                                                                                                                       |
| DBS                                                                         | Baseline, 1-, and 3-months                 |                                                                                                                                                                                                                                                                                       |
| Aliquoted plasma                                                            | Baseline, 1, 3, 6, 12-months               |                                                                                                                                                                                                                                                                                       |
| <b>Green Heparin (2 mL)</b>                                                 |                                            | Testing on fresh samples                                                                                                                                                                                                                                                              |
| CD4                                                                         | Baseline, 3-months                         |                                                                                                                                                                                                                                                                                       |
| <b>Purple EDTA (5 mL)</b>                                                   |                                            | Whole blood stored for future testing                                                                                                                                                                                                                                                 |
| Stored as whole blood in a 5mL polypropylene centrifuge tube                | Baseline                                   |                                                                                                                                                                                                                                                                                       |
| <b>Cell Prep Tube (8 mL)</b>                                                |                                            | Stored for future testing as 2 0.5mL aliquots of PBMCs and 1 mL aliquots of plasma                                                                                                                                                                                                    |
| Aliquoted heparin plasma and PBMCs                                          | Baseline                                   |                                                                                                                                                                                                                                                                                       |
| <b>Purple EDTA (9 mL)</b>                                                   |                                            |                                                                                                                                                                                                                                                                                       |

|                  |                              |                                               |
|------------------|------------------------------|-----------------------------------------------|
| Aliquoted plasma | Baseline, 1, 3, 6, 12-months | Stored for future testing in 0.5 mL aliquots. |
|------------------|------------------------------|-----------------------------------------------|

918  
919  
920  
921  
922  
923  
924  
925  
926  
927  
928  
929  
930  
931  
932  
933  
934  
935  
936  
937  
938  
939  
940  
941  
942  
943  
944  
945  
946  
947  
948  
949  
950  
951  
952  
953  
954  
955  
956  
957  
958

1. Cholesterol
  - a. Measured at baseline and 3-month study visits as part of the Reynold Risk Score, which assesses CHD risk and has been validated in large cohorts of men and women, and is routinely used in clinical practice.
2. hsCRP, IL-6
  - a. hsCRP and IL-6 are biomarkers of inflammation significantly associated with heavy alcohol consumption, smoking, incident CHD, and mortality in HIV+ people. These measures will be collected at baseline and 3-month study visits.
  - b. hsCRP is also used to calculate the Reynolds Risk Score
3. Rapid HIV Ab
  - a. Will be measured at baseline for screening purposes, to confirm participants HIV status.
4. CD4, HIV-1 RNA
  - a. Measured at baseline and 3-month study visits as part of the VACS Index, a validated surrogate measure of mortality in HIV+ people.
5. Hemoglobin and platelets
  - a. Measured at baseline and 3-month study visits as part of the VACS Index.
6. Creatinine
  - a. Measured at baseline and 3-month study visits as part of the VACS Index.
7. HCV Ab, AST, ALT
  - a. HCV Ab will be measured at baseline, and if negative at baseline, again at 3 months, as part of the VACS Index. AST, ALT will be measured at baseline and 3-month study visits as part of the VACS Index.
8. NMR and tobacco-genetics
  - a. Nicotine Metabolite Ratio (NMR) will be collected at baseline and 3-months and used to interpret study results. NMR is a genetically-informed biomarker of nicotine metabolism, knowing metabolizer type (fast/normal vs. slow) will inform the results comparing partial agonists to NRT for tobacco. This blood test will be run in Rachel Tyndale’s lab in Toronto.
  - b. Tobacco-genetic variants (variations in several genes that are known to predict nicotine metabolism, difficulty quitting, and performance with smoking-cessation medication) will be collected at baseline and used to interpret study results. These blood tests will be conducted in Dr. Tyndale’s lab in Toronto.
9. Oxidative stress
  - a. Oxidative stress will be measured at baseline and 3-months on stored plasma. High levels of oxidative stress can lead to cell and tissue damage through the increase of oxygen reactive species. Oxidative stress is associated with diabetes, atherosclerosis, high blood pressure, heart disease, and other inflammatory conditions.
10. TMAO
  - a. Trimethylamine N-oxide (TMAO) will be measured at baseline and 3-months on stored serum. Increased TMAO is associated with cardiovascular disease events.
11. BNP

- a. B-type natriuretic peptide (BNP) will be measured at baseline and 3-months on stored plasma. BNP is a biomarker of ventricular stretching.

### Unsuccessful Draw Protocol

At baseline and 3-month visits, a blood draw will be considered successful if the 6mL purple EDTA tube and 9mL red tube are full. If a blood draw is unsuccessful at baseline (i.e., the EDTA and red tube are not completely full), the participant will not continue with St PETER baseline procedures (assessment,

|  |  |                 |
|--|--|-----------------|
|  |  | <b>St PETER</b> |
|--|--|-----------------|

randomization, intervention) and will receive 1/3 compensation. Blood collected during an unsuccessful blood draw will be processed and stored. Participants will have 30 days upon completion of the screener to complete the baseline blood draw and baseline visit and receive full compensation. Participants with unsuccessful baseline blood draws will receive

1/3 (\$11) compensation at the initial attempt, 1/3 (\$11) at their second attempt, and the final 1/3 (\$11) at their third attempt. If the second attempt is successful, they will receive the remaining 2/3 (\$22) of the compensation at that time.

Blood collected at a re-draw requires the collection of both EDTA (6mL) and red (9 mL) tubes, regardless of if either tube was collected at any previous draw attempt. For participants with an incomplete (but successful) blood draw at baseline, tubes 4 (if the participant still reports smoking), 5, and 6 will be collected at the 2-week visit. If a participant fails to complete the baseline blood draw, he/she will be disenrolled after 30 days or 3 unsuccessful blood draw attempts.

If a blood draw is unsuccessful at the 1-, 6-, or 12-month study visit, it will be considered missing data and no re-draw attempts will be made.

If the blood draw is unsuccessful at the 3-month study visit, the participant will be given partial (1/2) compensation for completion of the assessment. The participant has 30 days to complete the blood draw attempt. Blood draw attempts will occur weekly (up to 4 times). The remaining 1/2 (\$16) of the compensation will be divided between the 4 weekly attempts (\$4 for each attempt). If the second or third attempts are successful, participants will receive the remaining 2/4 or 3/4 (\$8-\$12) at that time.

|                                    |                      |                                                                                                            |
|------------------------------------|----------------------|------------------------------------------------------------------------------------------------------------|
| Baseline                           | Timing of blood draw | Blood draw to take place prior to assessment; If blood draw is not successful, no assessment is conducted. |
|                                    | Compensation         | If blood draw is not successful, participant receives partial (1/3) compensation.                          |
|                                    | Window               | 30 days after completion of screener                                                                       |
|                                    | Final attempt        | Disenroll after 3 unsuccessful attempts or 30 days; provide full compensation at third/final attempt       |
| Follow up*<br>(3-month visit only) | Timing of blood draw | If blood draw is not successful, proceed to assessment                                                     |
|                                    | Compensation         | Given partial (1/2) compensation for completion of assessment                                              |
|                                    | Window               | 30 days after completion of assessment                                                                     |
|                                    | Final attempt        | 4 weekly attempts; at final attempt provide full compensation                                              |

006

007

008

Participants in the continued observational cohort will not have minimum draw requirements.

009

010

### 3.6.C. URINE

011

012

A pregnancy test will be administered by trained clinical research staff at screening to determine eligibility and at each study visit. Pregnant women will be excluded from the study due to some reports suggesting possible adverse events with study medications. Participants found to be pregnant will discontinue their study medication but will still be followed-up for the duration of the study.

016

Urine will also be used to conduct nicotine metabolite testing on all participants at baseline and 3-month study visits to validate participant smoking self-report. The nicotine metabolite testing panel will include nicotine, cotinine, 3-hydroxy cotinine, nornicotine, and anabasine. This testing will take place at the Helix lab in St. Petersburg.

020

Urine will be used to measure adherence to the study medications, as described in section 3.4b Adherence.

022

### 3.6.D. CARBON MONOXIDE

023

024

Carbon monoxide (CO) in the lungs will be measured at all in-person study visits, as part of the secondary outcome of CO-validated smoking cessation. The PICO+Smokerlyzer model will be used to measure the amount of CO (in parts per minute) in participant's breath and is a way to biochemically establish

026



027 smoking status. Furthermore, CO monitoring can act as a motivational visual aid to encourage  
028 participants towards smoking cessation and to measure their progress while quitting.  
029

### 030 3.6.E. BREATH ALCOHOL CONTENT

031  
032 Breath alcohol content will be tested at all in-person study visits to encourage truth telling. Breath  
033 alcohol testing only reflects recent alcohol use. Breathalyzer used for the study is the Dingo E-010  
034 manufactured by Sentech Korea Corp. and obtained in Russia.  
035

### 036 3.6.F. DRIED BLOOD SPOTS

037  
038 Dried blood spots (DBS) will be collected at baseline, 1-, and 3-month study visits for future  
039 phosphatidylethanol (PEth) testing. PEth will be tested at the United States Drug Testing Laboratories,  
040 Inc. (USDTL).  
041

## 042 4. OBSERVATIONAL COHORT

043  
044 All current Russia ARCH participants who do not initially meet eligibility criteria for St PETER HIV will be  
045 invited to continue their participation in the ongoing Russia ARCH cohort. The cohort experience will  
046 entail an assessment and blood draw at baseline and 12 months. At the 12-month visit, those Russia  
047 ARCH participants who initially did not meet enrollment criteria for St PETER HIV will be re-evaluated,  
048 and if eligible, will be offered enrollment into St PETER HIV, if enrollment is still ongoing. By continuing  
049 to follow existing Russia ARCH participants who did not enroll in St PETER HIV, this observational cohort  
050 can be used to improve our understanding of the natural history for smoking and heavy drinking among  
051 HIV+ people who either did not enroll or who did not meet St PETER HIV entry criteria.  
052

## 053 5. STUDY PROCEDURES

### 054 5.1 RECRUITMENT

055  
056 All existing Russia ARCH participants, who have agreed to be contacted for future studies, will be  
057 screened for St PETER HIV. Recruitment beyond Russia ARCH cohort will occur at non-governmental  
058 organizations (NGOs) and Russia ARCH network hospitals including the major clinical HIV hospitals  
059 (Botkin Infectious Disease Hospital, Leningrad Regional AIDS Center, St. Petersburg City AIDS Center)  
060 and addiction hospitals (Leningrad Regional Center for Addictions, St. Petersburg City Addiction  
061 Hospital) through notification of patients and providers at these sites and through word-of-mouth (i.e.  
062 snowball recruitment). At each of the recruitment sites flyers with information about the trial will be  
063 distributed to clinicians and peers working with HIV-infected patients. Study flyers will also be placed in  
064 registration areas. Flyers will provide a phone number (at FSPSMU) for interested individuals to call to

065 learn more about the study and undergo initial screening over the phone. On occasion, Pavlov research  
066 assessors may travel to screen participants at the affiliated clinical locations. Enrolled participants will be  
067 given flyers to distribute to potential participants who might be interested in the trial. If potential  
068 participants are interested, they will be responsible for directly contacting study staff listed on the flyer  
069 to be screened for eligibility. Referred participants who enroll in the study will provide the researcher  
070 with the name of the study participant who referred them. The referring study participant will be  
071 compensated 300 rubles for a successful referral at their next visit to Pavlov.

## 073 5.2 SCREENING

074  
075 Screening may take place over the phone or in-person. Verbal consent for screening will be obtained from  
076 all potential participants. Potential participants will be asked by a research assessor, either on the phone  
077 or in-person, their age, HIV infection status, current alcohol consumption and smoking status, interest in  
078 cutting down or quitting smoking or drinking, confirm residence within 100km of St. Petersburg, and  
079 possession of a phone, and two contacts to assist with follow-up, and ability and willingness to comply  
080 with all study protocols and procedures. If the participant is not fluent in Russian, has a cognitive  
081 impairment resulting in inability to provide informed consent, reports breastfeeding or being pregnant  
082 or planning to get pregnant, has a serious psychiatric illness, history of pheochromocytoma or seizures,  
083 has taken smoking cessation medication in the past 30 days, had acute coronary syndrome in the past  
084 month, has a history of Buerger's disease, is currently taking anti-tuberculosis medication, is currently  
085 taking Galantamine or Physostigmine, or has a known allergy to cytisine or varenicline , then s/he will  
086 also be deemed ineligible. After informed consent is signed, participant blood pressure and breath  
087 alcohol content will be measured, a confirmatory pregnancy test will be done for all female participants  
088 and rapid HIV testing will be conducted for all non-Russia ARCH participants. Data collected on  
089 participants who screen out will be kept in order to have an accurate record of the rate of enrollment  
090 among those screened for participation and to be able to identify reasons why potential participants are  
091 ineligible. The data will not have identifying information.

092 If a participant is screened over the phone, participant will be re-screened during his/her scheduled  
093 baseline visit.

## 095 5.3 INFORMED CONSENT

096  
097 Research assessors will conduct the consent process as well as obtain written consent. After eligibility  
098 and interest in enrollment is determined, an RA will administer and document the informed consent of  
099 the participant in a private location. The study will be explained to eligible participants who will be  
100 offered participation in the study. Research assessors will answer any questions the participants may  
101 have including risks, benefits and alternatives (including non-participation) to participation, and will  
102 provide written materials describing the study. If participants are unsure whether they would like to  
103 participate, they will be allowed any amount of time they need to consider participation in the study. If

104 the participant is not able to make a decision on the day of the initial visit, they will be invited to contact  
105 the study team once they have made their decision, at which point they will be re-screened, if more than  
106 3 days have passed since their initial screening. The written informed consent (in Russian), including the  
107 risks, benefits and alternatives, will be signed by the participant and the research assessor. As part of the  
108 informed consent process we will make it explicit to the participants that their involvement in the study  
109 does not constitute medical treatment and that they will not receive any HIV medical care as part of the  
110 study. We will provide a handout with information on addiction and HIV treatment services to  
111 participants at the baseline visit. A copy of the informed consent will be provided to the participant and a  
112 copy will be maintained by the research team. Potential participants will be informed that refusal to  
113 participate will not affect their medical care at FSPSMU in any way and they will be informed of their  
114 right to drop out of the study at any time.

### 116 5.3.A. OBSERVATIONAL COHORT

117  
118 If a participant is ineligible for the trial and was previously enrolled in the Russia ARCH cohort, the RA  
119 will offer participation in the observational cohort. The RA will explain the difference between the trial  
120 and cohort (there will only be a baseline and 12-month in person assessment for Russia ARCH cohort  
121 participants). If the participant is interested, the RA will continue with the informed consent process (a  
122 separate Informed Consent Form from the trial will be provided).

## 124 5.4 VISIT FLOW

125  
126 After eligible participants are consented and enrolled, the RA will follow these steps at the **Baseline visit**:

- 127 • Conduct HIV, pregnancy testing and measure blood pressure and breath alcohol content to verify  
128 eligibility
- 129 • Collect locator/contact information and check contact phone numbers
- 130 • Send participant for phlebotomy, collect clinical data (height, weight, blood pressure and urine  
131 sample [to send for nicotine metabolite testing], and obtain carbon monoxide reading)
- 132 • Administer assessment questionnaire
- 133 • Randomize participant
- 134 • Assess baseline symptoms
- 135 • Introduce study medication and instructions and develop an adherence plan
- 136 • Conduct behavioral counseling
- 137 • Compensate participant, provide list of resources, appointment reminder card, participation card,  
138 daily alcohol and cigarette use calendar, and schedule next visit

139 At the **2-week and 2-month medication visit**, the RA will perform the following:

- 140 • Review and update locator/contact information, verifying new numbers, as necessary
- 141 • Collect a urine sample to check for pregnancy and adherence

- 142 • Perform symptom monitoring
- 143 • Assess medication adherence
- 144 • Review medication instructions and adherence plan
- 145 • Compensate participant and schedule next visit

146 During the **1-, 3-, 6-, and 12-month assessments**, the RA will:

- 147 • Review and update locator/contact information, verifying new numbers, as necessary
- 148 • Collect a urine sample to check for pregnancy, adherence, and perform nicotine metabolite testing  
149 (pregnancy and adherence will be checked at 1- and 3-month visits only, and nicotine metabolite  
150 testing will be done at 3-months only)
- 151 • Send participant for phlebotomy, collect clinical data (height, weight, blood pressure) and obtain  
152 carbon monoxide and Breathalyzer readings
- 153 • Perform symptom monitoring (at 1- and 3-month visits only)
- 154 • Assess medication adherence (at 1- and 3-month visits only)
- 155 • Administer assessment questionnaire
- 156 • Review medication instructions and adherence plan (at 1-month visit only)
- 157 • Compensate participant, provide daily cigarette and alcohol use calendar (not at 12 months), and  
158 schedule next visit

## 160 **5.5 QUALITY ASSURANCE**

### 161 **Informed consent quality assurance**

162 The RA will review Informed Consent Forms (ICFs) for completeness with the participant present. Items  
163 to check will include, but are not limited to: responses/initials collected for all questions, correct version  
164 of ICF used, signed and dated by both subject and RA. Both the RA and project manager will review ICFs  
165 weekly for completeness.  
166

### 167 **Assessment quality assurance**

168 During the assessment, if the participant provides conflicting answers or answers that did not make  
169 logical sense (either within the same section or between sections), the RA will gently try to help the  
170 participant arrive at more logical answers. However, the RA will not force the participant to change his or  
171 her answers. Certain quality assurance checks are built into the assessment. The system will flag any  
172 inappropriate responses and prevent the RA from continuing until the issue is resolved. The RA will  
173 review the self-administered section with the participant present. If many “refused” options are selected,  
174 the RA will offer the participant the opportunity to complete those sections (the RA will accept the  
175 participant’s refusal if he or she does not wish to complete the section). The RA will never guess to  
176 correct a mistake. The only instance when a change can be made to the completed assessment is in the  
177 event that the RA is 100% certain that an error was made in data entry.  
178  
179  
180  
181

## 5.6 COMPENSATION

The 400 participants in the trial will receive the equivalent of US \$33 in goods or cash for their participation at baseline 1-, 3-, and 6-month study visits. Participants will receive the equivalent of US \$40 for the final 12-month study visit. All visits will involve the collection of blood for laboratory testing. Participants will also receive in total the equivalent of US \$14 for short medication check phone calls (4 phone calls, \$3.50/call) and the equivalent of US \$15 for short in-person medication visits at 2 weeks and 2-months post-baseline. Participants will have the option to delay phone call compensation, which they would receive in phone minutes, until the next in-person study visit. Similar compensation has been used in a previous collaborative Russian-Boston research study and was deemed by the FSPSMU Institutional Review Board (IRB) to be an appropriate, non-coercive, amount of funds for involvement in a clinical research project.

Participants of the extended Russia ARCH cohort who are not eligible for the trial will receive the equivalent of US \$25 for participation in the baseline and 12-month assessment visit.

Participants who provide updated contact information to research assessors in between research visits (i.e. not during the research assessment) will receive 200 rubles (approximately \$3) in goods or currency. In order to celebrate participant engagement and improve retention, the study team will provide an equivalent of 400 rubles (approximately \$7) in the form of a supermarket gift card for enrollment milestones at the 3-month and 12-month study visit.

Phone interviews will be offered to participants who are not able to make it to Pavlov for an in-person visit (partial [1/2] compensation will be provided for completion of the visit over the phone). Participants with unsuccessful baseline blood draws will receive 1/3 (\$11) compensation at the initial attempt, 1/3 (\$11) at their second attempt, and the final 1/3 (\$11) at their third attempt. If the second attempt is successful, they will receive the remaining 2/3 (\$22) of the compensation at that time. For an unsuccessful draw at 3 months, the participant will be given partial (1/2; \$16) compensation for completion of the assessment. The remaining 1/2 (\$16) will be divided between the 4 weekly attempts (\$4 for each attempt). If the second or third attempts are successful, participants will receive the remaining 2/4 or 3/4 (\$8-\$12) at that time.

Phone assessments will be completed for participants who are unable to come in to Pavlov due to COVID-19-related restrictions. Participants will receive full compensation for these phone assessments. Upon the restrictions being lifted, participants will be invited back to Pavlov to complete 6 and 12-month study visit procedures. At this time the assessment will also be re-administered if more than 30 days have passed since the participant's phone assessment. Participants will receive full compensation for both phone and in-person visits.

## 5.7 RETENTION

223 **Baseline visit:** Retention begins at baseline by ensuring that the participant enjoys the experience of  
224 participating in the study, by explaining the informed consent and what would happen in the study, and  
225 by collecting excellent contact information, including both the address where the participant is registered  
226 and the address where the participant is currently staying. Participants will be asked to provide contact  
227 information for 4-5 alternative contacts who may know their whereabouts. Alternative contacts can  
228 include friends, family members, and social workers. Participants will be asked if any of their friends are  
229 participating in the study and to include them as alternative contacts, if possible. Contact numbers must  
230 be verified by calling the numbers with the participant present, using the following script:

231 I am calling from Pavlov University. Your friend/relative [NAME] is here with me and just enrolled  
232 in a study. He/she has listed you as an alternative contact. We will only call you if we are having  
233 trouble reaching [NAME] to see if you can help us connect with them. Today I am just calling to  
234 confirm that this number is active.

235 If the alternative contact cannot be reached at the baseline visit, the RA will try to reach the contact again  
236 at the next in-person study visit. If the RA is unable to reach the contact at the following study visit, the  
237 participant will be asked to provide a different alternative contact. Participants will also be asked for  
238 their email address and membership to any social networking platforms.

239 **All visits:** Participants will be offered tea, coffee, water, and snacks at each study visit to make their  
240 experience in the research study more enjoyable.

241 RA will offer to help participants add the next scheduled study visit to the calendar in their phone and set  
242 a reminder in their phone.

243 **Follow up visits:** Contact information for participant and alternatives will be reviewed and updated at  
244 every visit.

245 **Other strategies:** Participants will be contacted by telephone with appointment reminders and email if  
246 one is provided. The study team will also utilize social networking to connect with participants. If  
247 participants are unable to be reached via phone, in addition to attempting to reach them via text  
248 messaging and email, participants will be sent private messages on Vkontakte (Russian social network)  
249 utilizing an existing standard script to remind them of their upcoming study visit. No sensitive  
250 information will be revealed or ascertained using this method. Study participants will be asked to contact  
251 the study team if their phone number changes between study visits; participants will be compensated  
252 200 rubles in goods or currency for this information. All no-shows will be followed up to reschedule  
253 appointments.

254 Participants who are continually unable to be reached will be sent a letter asking them to contact the  
255 study team. In the letter, compensation will be offered to participants (\$5) for calling the study team and  
256 updating their contact information. The letter will explicitly state that additional compensation would be  
257 received when the participant comes in for his/her scheduled study visit.

258 In order to celebrate continued participant engagement, we will provide an equivalent of 400 rubles  
259 (approximately \$6) in the form of a supermarket gift card for enrollment milestones at the 3-month and  
260 12-month study visit in addition to the pre-specified visit compensation.

261 Participants will be sent a happy birthday text message and receive sweets when they come in to  
262 complete a study visit near the time of major Russian holidays (i.e. New Year, Christmas).

263 The team will collaborate with affiliated hospitals by contacting staff to find out if any hard-to-reach  
264 participants are hospitalized at that location. If so, RAs can contact participants directly by phone to  
265 schedule an appointment post hospitalization. Furthermore, we will attach notes to the medical charts of  
266 hard-to-reach participants at local HIV centers for physicians to give to their patients when they are seen  
267 for medical visits. The note will provide the study team phone number and ask participants to call the  
268 study team to schedule their next study visit.

269 Phone interviews will be offered to participants who were not able to make it to FSPSMU for an in-person  
270 visit.

271 Transportation will be arranged (i.e., a social taxi or Uber) for participants who are unable to come to  
272 First St. Petersburg Pavlov State Medical University due to a lack of available transportation.

## 274 6. ASSESSMENTS

### 275 6.1 BASELINE ASSESSMENT

276 The baseline assessment will be conducted immediately following the screening, informed consent, and  
277 blood draw. Assessment will be interviewer-administered with the exception of sections deemed to ask  
278 sensitive questions, which will be self-administered by the participant.

280  
281 Participants will be assessed as part of this study using validated interview instruments covering the  
282 following topics:

- 283 • Demographics (marital status, education, employment, individual Income/security, date of birth,  
284 spouse HIV status, living situation, military service, arrest history, incarceration history)
- 285 • Alcohol use by the Timeline Followback (TLFB) calendar method with a 30-day assessment
  - 286 ○ Participants will also be provided with a calendar to record daily alcohol and cigarette use.  
287 They will be asked to complete this calendar at home and bring it back to all subsequent  
288 study visits. The calendar will be used as an aid by the RA when completing the TLFB with  
289 the participant.
- 290 • Alcohol use disorders using the Alcohol Use Disorders Identification Test (AUDIT)
- 291 • Alcohol dependent using DSM-5 criteria
- 292 • Alcohol consequences by the Short Inventory of Problems (SIP) for alcohol use
- 293 • Alcohol craving by the Penn Alcohol Craving Scale (PACS)
- 294 • Readiness to quit alcohol using Labrie et al.'s readiness to change ruler
- 295 • Cigarette use by the Timeline Followback (TLFB) calendar method with a 30-day assessment



- Nicotine dependence by the Fagerstrom Test
- Other tobacco use by adapted Population Assessment of Tobacco Health (PATH Study) questions
- Tobacco craving by the Questionnaire on Smoking Urges (QSU-Brief)
- Readiness to quit tobacco using the Connect to Quit readiness to quit ladder
- Smoking quit attempts
- HIV risk categories, using adapted questions from the American Red Cross
- Depressive symptoms through the Center for Epidemiologic Studies Depression Scale (CES-D)
- Anxiety by the Generalized Anxiety Disorder 7-item Scale (GAD-7)
- Trauma adapted from the revised Conflict Tactics Scales (CTS2) and World Health Organization. Composite International Diagnostic Interview (CIDI): Version 2.1
- HIV/HCV testing and treatment
- ART use and adherence, using modified Adult AIDS Clinical Trial Group (AACTG) ART adherence questions
- Opportunistic infections, using questions adapted from the HIV Cost and Services Utilization Study (HCSUS)
- Co-morbidities by an adapted Veterans Aging Cohort Study patient questionnaire
- Brief chronic pain via the Brief Chronic Pain Questionnaire
- HIV symptoms through a validated HIV Symptom Index from the NIAID Adult AIDS Clinical Trials Group
- Smoking-Related Symptoms via the 7-item Respiratory Index assessing Smoking-Related Respiratory Symptom Severity
- Reproductive health
- Falls using the ACTG 5322 Fall History Questionnaire
- TB testing and treatment
- Healthcare utilization using items from the Form 90 Alcohol Intake Revised/Economic Development (AIR/ED) used in COMBINE
- Prescription and non-prescription medication use
- Brief Pain Inventory using a modified Short Form of the Russian Brief Pain Inventory
- Drug use by an adapted version of the Risk Behavior Survey
- 24 Hour Activities through 6 questions developed by Matthew Freiberg (PI)
- Social support using a modified version of the Duke University-University of North Carolina Functional Support Questionnaire
- General health, quality of life, and cognitive function by the Veterans RAND 12-Item Health Survey (VR-12) and the Medical Outcomes Study HIV Health Survey (MOS-HIV)

#### 6.1.A. OBSERVATIONAL COHORT BASELINE ASSESSMENT

The observational cohort baseline assessment will be the same as the St PETER trial baseline assessment.

#### 6.2 FOLLOW UP ASSESSMENTS



336

337 Content of assessments administered at the 1-, 3-, 6-, and 12- month visits will be subsets of the baseline  
 338 assessment. In addition, questions about smartphone usage will be asked only at the 12-month  
 339 assessment. Questions about COVID-19 will only be asked at one time point, either the 6 or 12-month  
 340 assessment. Please see table of study questionnaires at the end of this section.

341

#### 342 6.2.A. MEDICATION VISITS ASSESSMENTS

343

344 Medication adherence and symptoms will be assessed during the six medication check-ins (in person at  
 345 weeks 2 and 8, and via phone at weeks 1, 3, 6, and 10).

346

#### 347 6.2.B. OBSERVATIONAL COHORT ASSESSMENTS

348

349 The observational cohort 12-month assessment will include all the same sections as the St PETER 12-  
 350 month assessment. Russia ARCH cohort participants will have the opportunity to be re-screened for the  
 351 St PETER trial at the time of their 12-month assessment.

352

| Administered Assessment                 | Study Time Point |                      |         |         |         |          |
|-----------------------------------------|------------------|----------------------|---------|---------|---------|----------|
|                                         | Baseline         | Medication Check-Ins | 1-Month | 3-Month | 6-Month | 12-Month |
| Demographics                            | X                |                      |         |         |         | X        |
| HIV/HCV Testing and Treatment           | X                |                      |         |         |         | X        |
| ART Use and Adherence                   | X                |                      |         |         | X       | X        |
| Opportunistic Infections (ever)         | X                |                      |         |         |         | X        |
| Healthcare Utilization (3mo timeframe)  | X                |                      |         |         | X       | X        |
| Co-Morbidities (ever)                   | X                |                      |         |         |         | X        |
| Smoking-related symptoms                | X                |                      | X       | X       | X       | X        |
| Brief Pain Inventory                    | X                |                      |         |         | X       | X        |
| Brief Chronic Pain Questionnaire        | X                |                      |         |         | X       | X        |
| Medications                             | X                |                      | X       | X       | X       | X        |
| HIV Symptom Index (1 mo timeframe)      | X                |                      |         |         |         | X        |
| Falls                                   | X                |                      |         |         |         | X        |
| TB testing and treatment                | X                |                      |         |         |         | X        |
| HIV Risk Categories                     | X                |                      |         |         |         |          |
| Depressive Symptoms (CES-D) (past week) | X                |                      | X       | X       | X       | X        |

|                                                                              |   |   |   |   |   |   |
|------------------------------------------------------------------------------|---|---|---|---|---|---|
| Anxiety (GAD-7)                                                              | X |   | X | X | X | X |
| DSM-5 Alcohol Use Disorder                                                   | X |   |   |   |   | X |
| Alcohol Use Disorders Identification Test (AUDIT) (need to adjust timeframe) | X |   |   |   | X | X |
| SIP                                                                          | X |   | X | X | X | X |
| 30-day Alcohol Timeline Followback (TLFB)                                    | X |   | X | X | X | X |
| Penn Alcohol Craving Scale                                                   | X |   | X | X | X | X |
| Readiness to Quit Alcohol                                                    | X |   | X | X | X | X |
| Tobacco Use (Fagerström)                                                     | X |   | X | X | X | X |
| 30-Day Cigarette Use Timeline Followback (TLFB)                              | X |   | X | X | X | X |
| Other tobacco use                                                            | X |   | X | X | X | X |
| Tobacco Craving (QSU)                                                        | X |   | X | X | X | X |
| Past smoking quit attempts                                                   | X |   |   |   | X | X |
| Readiness to Quit Tobacco                                                    | X |   | X | X | X | X |
| Drug Use (modified RBS) & Overdose & Opioid Craving VAS                      | X |   | X | X | X | X |
| 24 Hour Activities                                                           | X |   | X | X | X | X |
| Social Support Scale (4 weeks)                                               | X |   |   |   |   | X |
| Reproductive Health                                                          | X |   |   |   |   | X |
| VR-12 Health Survey & MOS HIV                                                | X |   |   |   |   | X |
| Trauma                                                                       | X |   |   |   |   | X |
| Baseline Symptom Monitoring                                                  | X |   |   |   |   |   |
| Medication Adherence                                                         |   | X | X | X |   |   |
| Medication Side Effect Checklist                                             |   | X | X | X |   |   |
| Medication satisfaction                                                      |   |   | X | X |   |   |
| Blinding questions                                                           |   |   | X | X |   |   |
| Smartphone questions                                                         |   |   |   |   |   | X |
| COVID-19 questions                                                           |   |   |   |   | X | X |

353

## 354 7. PARTICIPANT SAFETY

355

356 Participant safety will be monitored in person in weeks 2, 4, 8, and 12 and over the phone in weeks 1, 3,  
357 6, and 10 and more frequently, if necessary.

358

### 359 7.1. SPECIFICATION OF SAFETY PARAMETERS

360

361 An **Adverse Event (AE)** is defined as any untoward or unfavorable medical occurrence in a human  
362 subject, including any abnormal sign (for example, abnormal physical exam or laboratory finding),  
363 symptom, or disease, temporally associated with the subject's participation in the research, whether or  
364 not considered related to the subject's participation in the research.

365  
366 An AE can therefore be any new sign, reaction, symptom, event, disease or a worsening in frequency or  
367 severity of a preexisting condition that occurs during the course of the study.

368 *Stable chronic conditions that were present prior to study entry and do not worsen are not considered AEs.*

369  
370 **SERIOUS Adverse Event (SAE)** – for an event to be defined as serious, it will be Grade 1-6 below. Grade  
371 0 would be “not serious”.

372 Grade (1) results in death;

373 Grade (2) is life-threatening (places the subject at immediate risk of death from the event as it occurred);

374 Grade (3) results in inpatient hospitalization or prolongation of existing hospitalization;

375 Grade (4) results in a persistent or significant disability/incapacity;

376 Grade (5) results in a congenital anomaly/birth defect; or

377 Grade (6) based upon appropriate medical judgment, may jeopardize the subject's health and may  
378 require medical or surgical intervention to prevent one of the other outcomes listed in this definition  
379 (examples of such events include allergic bronchospasm requiring intensive treatment in the emergency  
380 room or at home, blood dyscrasias or convulsions that do not result in inpatient hospitalization, or the  
381 development of drug dependency or drug abuse).

382  
383 **Unanticipated Problem (UP)** – for an event to be an Unanticipated Problem it must

- 384 - be unexpected AND
- 385 - be related or possibly related to participation in the research AND
- 386 - suggest that the research places subjects or others at a greater risk of harm (including physical,  
387 psychological, economic, or social harm) than was previously known or recognized. OR meet the  
388 definition of SERIOUS

389  
390 **Suspected Adverse Drug Reaction** – Any adverse event for which there is a reasonable possibility that  
391 the drug caused the adverse event. Reasonable possibility means there is evidence to suspect a causal  
392 relationship. It is considered unexpected if it is not consistent with the risk information described in the  
393 general investigational plan. A suspected adverse drug reaction will be defined as a recorded adverse  
394 event that is unexpected and deemed to be possibly, probably, or definitely related to the study drug.

## 396 7.2 THE METHODS AND TIME FOR ASSESSING, RECORDING, AND ANALYZING SAFETY PARAMETERS

- 398 • Participant symptoms will be assessed at baseline to document any chronic conditions or symptoms  
399 that existed prior to introduction of study medication. These will be documented on the Baseline AE  
400 log. This list will be reviewed and compared to reported events throughout the study. *If the*  
401 *participant reports the same ongoing symptom (same severity) during subsequent visits, the symptom*  
402 *should not be recorded as an Adverse Event (AE). If the event is new (not previously reported) or*  
403 *worsened, as determined by RA, then the AE should be reported.*  
404
- 405 • During each scheduled visit, the RA will ask the participant how he or she feels and review the list of  
406 symptoms of concern (starting with the symptoms recorded at the previous visit). Any event that  
407 meets the above criteria for an AE/SAE/UP must be recorded. In the case of unresolved AEs, clinical  
408 staff will update the AE log with any follow-up information that is gathered during their investigation.  
409
- 410 • The site will receive the results of all blood work that is performed on study participants from the  
411 designated lab. If the lab results meet the criteria described in the protocol as an AE and are  
412 considered clinically significant by the site clinician then an AE will be recorded. **Please see Box 1.**  
413
- 414 ▪ Participants will be alerted of abnormal lab results and will receive a recommendation to see  
415 their local provider. All abnormal lab results obtained at the baseline visit will be listed on the  
416 Baseline AE log. During follow-up visits, abnormal lab results will be listed as an AE *only if* the  
417 abnormal lab results:
    - 418 • Develop at follow-up (i.e., were not previously recorded at baseline).
    - 419 • Worsen in severity compared to what was previously recorded at baseline.
    - 420 • Or are considered clinically significant.
    - 421 • If baseline creatinine levels are indicative of reduced kidney function (< 30 cc/min),  
422 study investigators will reduce the dose of varenicline by 50%.
  - 423 • All AEs will be assessed to determine if they meet criteria for a Serious Adverse Event (SAE). If  
424 the AE is serious, then the SAE form must be completed and appropriate reporting measures  
425 followed (see below). Investigators are encouraged to consult with the US team, if they are  
426 uncertain how to classify an event.
  - 427 • The list of subject's current medications will be reviewed and updated at every study visit,  
428 starting at baseline.
  - 429 • If an event is discovered outside of the scheduled study visits, it must still be recorded  
430 accordingly.
  - 431 • Action Taken will be determined by the RAs for all AEs that are Mild and Moderate (unless  
432 specified below) and by the Site PI for SAEs and AEs that are severe, life-threatening or fatal.  
433
- 434  
435  
436  
437  
438

**Box 1. Abnormal Lab Results**

|                            | <b>A. Normal Lab Values</b>                                         |
|----------------------------|---------------------------------------------------------------------|
| <b>Cholesterol (total)</b> | to 5.2 mmol/L                                                       |
| <b>HDL</b>                 | M: >1.45 mmol/l; F: >1.68 mmol/l                                    |
| <b>HS CRP</b>              | to 5 mg/l                                                           |
| <b>CD4</b>                 | 28.2 – 62.8 %                                                       |
| <b>Hemoglobin</b>          | M: 130-160 g/l;<br>F: 120-140 g/l                                   |
| <b>Platelet</b>            | M: 180-320 x 10 <sup>9</sup> /l;<br>F: 180-320 x 10 <sup>9</sup> /l |
| <b>eGFR (Crea)</b>         | M: to 120 mcmol/l<br>F: to 110 mcmol/l                              |
| <b>HCV Ab</b>              | negative                                                            |
| <b>AST</b>                 | M: to 38 units/L F: to 32 units/L                                   |
| <b>ALT</b>                 | M: to 41 units/L F: to 31 units/L                                   |

439  
440  
441  
442  
443  
444  
445  
446  
447

**7.3. PROCEDURES FOR ELICITING REPORTS OF AND FOR RECORDING AND REPORTING ADVERSE EVENT AND INTERCURRENT ILLNESSES**

For any reported side effect: While with the participant, study personnel will listen, identify, and document the symptoms. The following symptoms will be assessed at baseline and during medication check-ins and study visits while participant is taking the study medication. All events will be documented on the Symptom Checklist and on AE forms.

| <b>Symptom</b>                                   |
|--------------------------------------------------|
| Agitation and/or Irritability                    |
| Anger                                            |
| Depressed mood                                   |
| Anxiety (includes nervousness and panic attacks) |
| Restlessness                                     |
| Insomnia and/or other sleep problems             |
| Abnormal dreams and/or nightmares                |
| Headaches                                        |

|                        |      |
|------------------------|------|
| Dizziness              | 1448 |
| Nausea and/or vomiting | 1449 |
| Fatigue                | 1450 |
| Hiccups                | 1451 |
| Cough                  | 1452 |
| Throat irritation      | 1453 |

454 Symptoms at the severity level listed below must be reported to the Site PI immediately during study  
455 visit or within 24 hours to assess the need for study medication dosing changes.  
456

| <b>Side Effect Checklist</b>                                          |                            |
|-----------------------------------------------------------------------|----------------------------|
| Agitation and/or Irritability                                         | Severe                     |
| Anger                                                                 | Severe                     |
| Depressed mood                                                        | Moderate<br>Severe         |
| Anxiety (includes nervousness and panic attacks)                      | Moderate<br>Severe         |
| Headache                                                              | Severe                     |
| Dizziness                                                             | Severe                     |
| Nausea and/or vomiting                                                | Severe                     |
| <b>Open Ended Responses</b> ( <i>this is not an exhaustive list</i> ) |                            |
| Allergic reaction                                                     | Severe                     |
| Asthma                                                                | Severe                     |
| Blood pressure increase                                               | Severe                     |
| Cancer                                                                | Any reporting              |
| Trouble concentrating                                                 | Severe                     |
| Confusion                                                             | Severe                     |
| Death                                                                 | Any reporting              |
| Emergency Room Visit                                                  | Any reporting              |
| Fainting                                                              | Mild<br>Moderate<br>Severe |
| Heart Attack/MI                                                       | Any reporting              |
| Hospitalization                                                       | Any reporting              |
| Neurological event<br>Stroke/TIA, etc                                 | Mild<br>Moderate<br>Severe |
| Psychiatric event<br>(not related to suicide)                         | Moderate<br>Severe         |
| Racing thoughts                                                       | Severe                     |
| Seizure                                                               | Mild<br>Moderate<br>Severe |

|                     |                    |
|---------------------|--------------------|
| Shortness of Breath | Moderate<br>Severe |
|---------------------|--------------------|

#### 7.3.A. OTHER EVENTS

- Other events may or may not be associated with study drug use, but will be recorded, AE form completed and the Site PI will be notified immediately to address the report.
- The Site PI will evaluate the reported symptoms using clinical judgment to determine if they are related to the study and if study medication should be adjusted or ceased.
- The Site PI determine that study medications should be ceased, study personnel will attempt to contact the participant as soon as possible.
- If applicable, staff can advise participants to contact their physician immediately or call emergency services.
- Participants will receive a card to provide to medical staff in the case of a hospitalization or emergency stating that they are involved in a research study and are randomized to one of three active study medications.

#### 7.3. B. PARTICIPANT ADVICE

- For certain, relatively common side effects, such as mild-moderate gastrointestinal (GI) problems and moderate sleep problems RA will provide the following advice:
  - For moderate GI problems, RA will remind the participant that the side effect typically gets better within 2-3 weeks following initiation of medication and that they should take the medication after eating.
  - For moderate sleep problems, RA will remind the participant that the side effect typically gets better within 2-3 weeks following initiation of medication and that they should be sure to take their first dose in the early AM so that they can take the second dose in the afternoon.
- For participants who normally drink caffeine or take caffeine pills, make them aware that chemicals (polyaromatic hydrocarbons) in cigarette smoke actually metabolize caffeine, so generally smokers “need” more caffeine when they are smoking at their usual rate. However, when they cut down on smoking or quit altogether, but keep taking in the same amount of caffeine, they may feel jittery, irritable, nauseated, etc, due to higher-than-usual blood levels of caffeine. At the first visit, please suggest that participants reduce caffeine intake by half as they are cutting down or quitting smoking; then they can adjust caffeine up or down from there as tolerated.

#### 7.3. C. ADVERSE EVENT REPORTING

The following information should be present to complete AE and SAE forms during the initial report (on the day of finding out about the event):

495  
496  
497  
498

- Description of the event
- Date of onset and resolution (if known)
- Severity – based on established criteria: [https://evs.nci.nih.gov/ftp1/CTCAE/CTCAE\\_4.03\\_2010-06-14\\_QuickReference\\_5x7.pdf](https://evs.nci.nih.gov/ftp1/CTCAE/CTCAE_4.03_2010-06-14_QuickReference_5x7.pdf) \* See Box 2

### Box 2. Guidelines for Severity Grades

\*Research assessor will refer to the guide for unique clinical descriptions of severity for each AE, which will follow the general guideline below:

- Grade 1 Mild; asymptomatic or mild symptoms; clinical or diagnostic observations only intervention not indicated.
- Grade 2 Moderate; minimal, local or noninvasive intervention indicated; limiting age-appropriate instrumental activities ADL\*.
- Grade 3 Severe or medically significant but not immediately life-threatening; hospitalization or prolongation of hospitalization indicated; disabling; limiting self care ADL\*\*.
- Grade 4 Life-threatening consequences; urgent intervention indicated.
- Grade 5 Death related to AE.

Not all Grades are appropriate for all AEs. Therefore, some AEs are listed with fewer than five options for Grade selection. Grade 5 (Death) is not appropriate for some AEs and therefore is not an option.

#### Activities of Daily Living (ADL)

\*Instrumental ADL refer to preparing meals, shopping for groceries or clothes, using the telephone, managing money, etc.

\*\*Self care ADL refer to bathing, dressing and undressing, feeding self, using the toilet, taking medications, and not bedridden.

499  
500  
501  
502  
503  
504  
505  
506  
507  
508  
509

- Assessment of expectedness (is the event anticipated in terms of nature, severity, or frequency) given (a) the research procedures that are described in the IRB protocol and informed consent document; and (b) the characteristics of the subject population being studied
  - Assessment of relatedness to study drug
  - Any actions taken
- Following the initial report, additional information may need to be gathered to complete the AE and SAE forms and to evaluate the event for relatedness. This process may include obtaining hospital discharge reports, physician records, autopsy records or any other type of records or information necessary to provide a complete and clear picture of the SAE and events preceding and following the event.

### 7.3.D. SAE REPORTING

510  
511  
512  
513  
514  
515  
516  
517

If the SAE is not resolved or stabilized at this time or new information becomes available after the SAE form is completed, the SAE form should be updated as soon as possible. Any changes or updates to the SAE form will need to be re-reviewed and re-authorized by the study clinician.

In some cases, the study clinician may be unsure upon first learning of an SAE whether it is study related and/or expected, because study staff are awaiting more complete medical records. In such cases, the study clinician should make his/her best estimate of relatedness and expectedness, understanding that



518 these determinations can be updated later. When updating determinations at a later date, the rationale  
519 for the change should be included in the SAE narrative.

520  
521 The site must actively seek information about the SAE until the SAE is resolved, stabilized or until the  
522 participant is lost to follow-up and terminated from the study.

523  
524 To summarize: upon determining an Adverse Event is Serious, the following procedures should be  
525 followed:

- 526  
527 • The study staff, while meeting/talking with the participant or person providing details on the event,  
528 will gather as much information about the event from the participant as possible and complete the  
529 appropriate forms.
- 530  
531 • The completed AE and SAE forms will be reviewed by key personnel on the Pavlov team (e.g. Site  
532 PI). Any relevant clinical documents (labs, physician notes) available at that time will be provided to  
533 key personnel on the Pavlov team (e.g. Site PI) within 24 hours of finding out about the event.
- 534  
535 • After initial notification, the SAE must be updated with any additional information.

536  
537 All unanticipated problems must be reported to the US team immediately. The US team will report all UPs  
538 to the BUMC IRB and NIAAA within 48 hours of discovering their occurrence.

539  
540 SAEs and unanticipated events which are considered “at least possibly related” during the treatment and  
541 follow-up phases will be reported to NIAAA within 48 hours of knowledge of the SAE.

542  
543 AEs and SAEs will be reported to the URBAN ARCH Data Safety Monitoring Board every six months and as  
544 needed.

545 **BUMC Reporting Guidelines:**

546 The Principal Investigator at BMC/BU Medical Campus will report Unanticipated Problems and Adverse  
547 Events to the BMC/BU Medical Center IRB in accordance with IRB policies:

- 548 • Unanticipated Problems involving a fatal or life-threatening event will be reported to the IRB within  
549 2 days of the investigator learning of the event.
- 550 • Unanticipated Problems not involving a fatal or life-threatening event will be reported to the IRB  
551 within 7 days of the investigator learning of the event.
- 552 • Adverse Events (including Serious Adverse Events) will be reported in summary at the time of  
553 continuing review, along with a statement that the pattern of adverse events, in total, does not  
554 suggest that the research places subjects or others at a greater risk of harm than was previously  
555 known.

556  
557  
558 **Pavlov Reporting Guidelines:**

| What Event is Reported | When is Event Reported |
|------------------------|------------------------|
|------------------------|------------------------|

|                                                                                 |                                                           |
|---------------------------------------------------------------------------------|-----------------------------------------------------------|
| Fatal or life-threatening unexpected, suspected serious adverse reactions       | Within 7 calendar days of initial receipt of information  |
| Non-fatal, non-life-threatening unexpected, suspected serious adverse reactions | Within 15 calendar days of initial receipt of information |
| AEs and UPs                                                                     | On a quarterly basis                                      |

560

561

**7.4. THE TYPE AND DURATION OF THE FOLLOW-UP OF SUBJECTS AFTER ADVERSE EVENTS**

562

All adverse events (including serious adverse events) will be followed until the event is resolved, stabilized, or until the end of individual’s participation in the study.

563

564

The Site PI will determine a follow up plan on a case-by-case basis based on their clinical judgment. After the 3-month visit, ongoing adverse events will be followed monthly until the event is resolved or until the end of individual’s participation in the study.

565

566

567

All baseline events (symptoms/conditions that existed prior to participant’s enrollment in the study) will be followed at each study visit until the event is resolved or until the end of individual’s participation in the study.

568

569

570

**7.5. UNBLINDING PROTOCOL**

571

Participants may be unblinded if there is an urgent medical need, as determined by the clinician evaluating the participant. If a participant is unblinded, study medication may be discontinued.

572

573

The following are examples of events that may result in emergency unblinding:

574

-An SAE occurs that is thought to be most likely or definitely related to the study drug.

575

-An AE or SAE occurs and the clinician treating the patient concludes that knowledge of the treatment arm is necessary to determine the therapy provided to the patient.

576

577

-The study drug is accidentally ingested by a child.

578

Participant experiences an event that may require unblinding.

579

580

Site PI assesses if the event requires emergency unblinding.

581

582

583

584

Request for emergency unblinding sent to the Pavlov pharmacist; PIs are alerted. Only Site PI receives unblinding information; it is not shared with assessors.

585

Unblinding not done

S

## 7.6. DATA SAFETY AND MONITORING BOARD

The Data and Safety Monitoring Board (DSMB) will monitor the URBAN ARCH Cohort studies (i.e., Uganda, Russia, Boston) and Intervention trials (i.e., ZINC, ST PETER, ADEPT-TB). The DSMB will act in an advisory capacity to the study PIs and NIAAA to monitor participant safety, data quality and evaluate the progress of the studies being conducted under the URBAN ARCH consortium funded by the National Institute on Alcohol Abuse and Alcoholism.

The DSMB is responsible for ensuring subject safety (by reviewing blinded and unblinded safety data on a regular basis and assessing the safety of study procedures) and for monitoring the overall conduct of the studies. The focus will be on the clinical drug trials as that is where the greatest potential risk lies; however, the DSMB will still monitor enrollment, follow up and adverse events of the cohort studies. No interim efficacy analyses will be conducted for any of the studies.

The DSMB is an independent group advisory to the PIs and the NIAAA, and is required to provide recommendations about starting, continuing, temporarily suspending the trial until certain conditions are met, and stopping the studies. In addition, the DSMB is asked to make recommendations, as appropriate, about:

- Benefit/risk ratio of procedures and participant burden
- Selection, recruitment, and retention of participants
- Protocol violations and adherence to protocol requirements
- Completeness, quality, and analysis of measurements
- Amendments to the study protocol and consent forms
- Participant safety
- Notification of and referral for abnormal findings

This DSMB will meet every six months. In cases where Institutional Review Boards or the NIH require more frequent monitoring, procedures will be put into place to conform to those requirements. An agenda will be provided detailing the studies to be discussed. It is estimated that the meeting will be scheduled for 1.5 hours. Each protocol and data review meeting will consist of two sessions: Open Session and Closed Session. Communication in the interim will be as needed. Unscheduled meetings can be requested by any party with the responsibility of overseeing the study. Requests can be made to the DSMB Chair, PIs, or NIAAA officials. The Chair, in collaboration with the Admin Core or NIAAA, will schedule any unplanned meetings.

## 8. DATA MANAGEMENT

### 8.1 DATA COLLECTION

622 All study data will be captured electronically on netbooks via a secure, web-based data capture system  
623 with the exception of: TLFB data, which will be collected on paper calendars.  
624

## 625 **8.2 QUALITY CONTROL PROCESS**

626  
627  
628 Quality control measures will include: detailed and unambiguous specifications for completion of data  
629 forms, including rules for coding skipped questions and missing data, training of study staff responsible  
630 for data collection and built-in validation rules, error checks, question skips for electronic data capture,  
631 and computer algorithms to check for out-of-range codes and internal inconsistencies. All data,  
632 regardless of capture method, will be converted to SAS datasets and reviewed for logic, skip patterns,  
633 response ranges, out-of-range codes, and internal inconsistencies. The RAs will be queried monthly  
634 regarding any noted inconsistencies.  
635  
636

## 637 **8.3 DATA SECURITY AND CONFIDENTIALITY**

638  
639 Screening forms and most other research paperwork will not include the participant's name; instead, a  
640 unique ID will be assigned to each person screened, and another number assigned to those who enrolled.  
641 Any documents with identifiable participant data will only be accessible to the Russian Co-Investigators,  
642 the project manager, and the RAs who recruit and follow participants.  
643

644 Tracking information will be kept similarly. Computer data will be password protected, and accessible  
645 only to research associates needing the information for follow-up purposes.  
646

647 The BDM Core of the ARCH Consortium will design, develop and maintain the electronic data collection  
648 forms, participant and data tracking, and underlying SQL database systems, and implement procedures  
649 for data quality control, including multiple checks for entered data. Electronic data collection forms will  
650 be designed to read easily, have clear instructions, preprogrammed skip patterns, real-time range checks  
651 and internal logic to minimize missing data and result in "cleaner" data at capture. The website and  
652 accompanying database will be located on secure, password-protected servers, behind the BU firewalls.  
653 The BDM Core has access to two Unix servers, including a Linux Beowulf cluster currently configured  
654 with 118 CPUs, as well as an SMP Linux server with 4 x Six-Core AMD Opteron processors (a total of 24  
655 cores x 2.4 GHz each), 64 GB of RAM, and 6 TB (4TB usable) storage capacity. Additionally, the Data  
656 Coordinating Center (DCC) has three dedicated servers, all of which are dual processors with 150  
657 gigabytes for data storage: an SQL database server; a server used for Web site development and  
658 management, running Internet Information Server for web page hosting; and a server used for web  
659 development pre-production testing environment. The web and database servers will use Secure Socket  
660 Layering (SSL) to ensure data security and confidentiality. Two fax servers, an additional server, and a  
661 flatbed scanner comprise the Teleform® system. Servers incorporate RAID hard drives for data  
662 redundancy. A separate web server dedicated for Cold Fusion applications is also available.  
663

| FORM | STUDY VISIT  |                         |      |             |              |             |            |                       |            |            |            |             |           |
|------|--------------|-------------------------|------|-------------|--------------|-------------|------------|-----------------------|------------|------------|------------|-------------|-----------|
|      | Phone Screen | Screen & Baseline Visit |      | 1 week call | 2 week visit | 3 week call | 1 mo visit | Calls in weeks 6 & 10 | 2 mo visit | 3 mo visit | 6 mo visit | 12 mo visit | As Needed |
|      |              | Screen                  | Base |             |              |             |            |                       |            |            |            |             |           |

664

**8.4 WEB SYSTEMS**

665

666

667

668

669

670

671

672

673

674

The study will use two web systems: a computerized tracking system and REDCap. The computerized tracking system will contain all participant tracking details. This system will be web-based, allowing multiple users to access the system. REDCap is a secure web application for building and managing online surveys and databases and will be used for screening and assessments purposes. Study forms will be completed according to the schedule below.

Based on information entered into web-based tracking system by assessors, the DCC will run reports to generate information on scheduled visits and reminder calls. These reports will be updated twice daily at 7:00am EDT (14:00 MSK) and 7:00pm EDT (2:00 MSK).

|                                                      |   |   | line |   |   |   |   |   |   |   |   |   |   |
|------------------------------------------------------|---|---|------|---|---|---|---|---|---|---|---|---|---|
| Pre-Screener                                         | X |   |      |   |   |   |   |   |   |   |   |   |   |
| Screener                                             |   | X |      |   |   |   |   |   |   |   |   |   |   |
| Consent and enrollment form                          |   | X |      |   |   |   |   |   |   |   |   |   |   |
| Contact info                                         |   |   | X    | X | X | X | X | X | X | X | X | X | X |
| Phlebotomy form                                      |   |   | X    |   |   |   | X |   |   | X | X | X |   |
| Lab Processing form                                  |   |   | X    |   |   |   | X |   |   | X | X | X |   |
| Full assessment                                      |   |   | X    |   |   |   | X |   |   | X | X | X |   |
| Contact log                                          |   |   |      |   |   |   |   |   |   |   |   |   | X |
| Baseline Event Form                                  |   |   | X    |   |   |   |   |   |   |   |   |   | X |
| Symptom Monitoring Form                              |   |   |      | X | X | X | X | X | X | X |   |   |   |
| Medication visit checklist                           |   |   | X    |   | X |   | X |   | X |   |   |   |   |
| Medication collection (Paper)                        |   |   | X    | X | X | X | X | X | X | X |   |   | X |
| Baseline tracking form                               |   |   | X    |   |   |   |   |   |   |   |   |   |   |
| Short assessment (adherence)                         |   |   |      | X | X | X |   | X | X |   |   |   |   |
| Follow-up tracking form                              |   |   | X    | X | X | X | X | X | X | X | X | X |   |
| Participant tracking overview                        |   |   |      |   |   |   |   |   |   |   |   |   | X |
| Study conclusion form                                |   |   |      |   |   |   |   |   |   |   |   |   | X |
| AE/SAE form (paper and Web)                          |   |   |      |   |   |   |   |   |   |   |   |   | X |
| Incarceration form                                   |   |   |      |   |   |   |   |   |   |   |   |   | X |
| All forms are electronic, unless indicated otherwise |   |   |      |   |   |   |   |   |   |   |   |   |   |

675

676

## 9. STATISTICAL ANALYSIS

677

678

679

680

681

682

683

684

685

686

687

688

689

This study will use an intent-to-treat analysis that includes all participants according to their randomized assignment. Descriptive statistics will be calculated for variables at baseline and each follow-up time to assess whether there appear to be any differences across treatment arms.

Our Specific Aims are to compare the effects of varenicline, cytisine, and NRT among HIV+ heavy drinkers and current daily smokers for the following outcomes:

1. % Heavy drinking days in past month (self-report, primary outcome) and alcohol craving (self-report);
2. Cigarettes per day (past week, self-report); 7-day point prevalence abstinence (biochemically verified);
3. Inflammation (hsCRP, IL-6), CHD risk (Reynolds risk score), and mortality risk (VACS index).

Self-reported alcohol and tobacco outcomes (Aims 1-2) will be collected at 1, 3, 6, 12 months. Aim 3 outcomes will be collected at 3 months.

690

691 The 3 pairwise comparisons of interest are:

- 692 1. varenicline vs. NRT (Arms 1 vs 2)
- 693 2. cytisine vs. NRT (Arms 3 vs. 4)
- 694 3. varenicline vs. cytisine (Arms 1 vs. 3)

695

696

## 9.1 PRIMARY ANALYSES

697

698 The main analysis evaluating the impact of each intervention on the primary study outcome (i.e., the  
699 continuous variable % HDD at 3 months) will use multiple regression models. The models will include  
700 indicator variables to represent study arm. We will test 3 pairwise comparisons (i.e., varenicline + NRT  
701 placebo vs. NRT + varenicline placebo; cytisine + NRT placebo vs. NRT + cytisine placebo; varenicline vs.  
702 cytisine) and will adjust for the multiple comparisons using the Hochberg sequential test procedure. To  
703 improve efficiency, the regression analyses will control for stratification factors: alcohol consumption ( $\geq$   
704 3 vs.  $<$  3 heavy drinking days in the past week according to NIAAA risky drinking criteria, assessed via the  
705 first 7 days of the Timeline Follow Back), average daily cigarettes ( $\leq$  1 vs.  $>$ 1 pack per day, assessed via  
706 question 5 of the Tobacco Use section), and current ART use [yes vs. no]. If the data are normally  
707 distributed, multiple linear regression models will be used. However, if the distribution of % HDD is  
708 skewed, transformations of the data will be performed (e.g., log transformation). If an appropriate  
709 transformation is not identified, a median regression model will be used. Continuous outcomes (e.g.,  
710 cigarettes per day in the past week, primary outcome Aim 2; biomarkers of inflammation, Reynold's risk  
711 score, VACS Index, primary and secondary outcomes for Aim 3) will be analyzed using the same approach  
712 described above. If count data (e.g., number of cigarettes) are not approximately normally distributed,  
713 they will be analyzed using Poisson or negative binomial (to account for overdispersion) regression  
714 models. Binary outcomes (e.g., smoking cessation, secondary outcome Aim 2) will be analyzed using  
715 logistic regression models. Models will control for stratification factors as described above for % HDD. A  
716 secondary analysis will be conducted using a per protocol approach that includes only those participants  
717 who were adherent to their assigned intervention (i.e., taking study medications or placebos 80% of the  
718 time), as determined by pill count.

719

720

## 9.2 ADDITIONAL EXPLORATORY ANALYSES

721

### **Intervention effects over time**

722 The main analyses will focus on % HDD at 3months, our primary outcome. Primary analyses of smoking  
723 and inflammation are also assessed at 3 months. However, given the repeated measures of our alcohol  
724 and smoking variables (i.e., 1, 3, 6, and 12 months), additional analyses using longitudinal regression  
725 models will be used to incorporate repeated measures for each outcome (alcohol and smoking) in the  
726 same model and will test for possible intervention by time interactions (e.g., does the effect of varenicline  
727 or cytisine change over time). For continuous outcomes (e.g., % HDD), we will use generalized linear  
728 mixed effects models that include subject-specific random intercepts and slopes to account for the  
729 correlation due to having repeated observations from each subject. For dichotomous outcomes, we will

730

731 use generalized estimating equations (GEE), with an independence working correlation matrix, a logit  
732 link; standard errors will be based on the empirical-sandwich estimator. Secondary analyses will also be  
733 performed using mixed effects logistic regression models for correlated binary outcomes. The GEE  
734 approach compares population averages over time and the mixed effects approach models subject-  
735 specific effects; the latter is computationally more intensive and requires more modeling assumptions  
736 but may be more powerful if the assumptions are correct.

### 737 **Effect Modification**

738 Because heavy alcohol use, depressive symptoms and opioid use are common in Russia ARCH we will  
739 perform additional analyses to explore whether baseline alcohol consumption ( $\geq 15$  HDD in past month),  
740 depressive symptoms (measured by CES-D score  $\geq 16$ ) or opioid use (self-reported history of opioid use  
741 in Russia ARCH assessment) are potential effect modifiers of the interventions. We will fit separate  
742 models that include 2-way interactions between randomization group and each potential effect modifier.  
743 If an interaction is significant, subsequent stratified analyses will be conducted to evaluate the effect of  
744 varenicline/cytisine by alcohol, depressive symptoms, or opioid group. Exploratory analyses will also  
745 examine intervention effects by sex to describe and estimate effects within each subgroup.

### 747 **Mediation**

748 We will explore potential mechanisms through which the interventions are mediated. For example, the  
749 interventions may lead to a reduction in alcohol use, which in turn leads to reduced inflammation, CHD  
750 risk, and mortality risk. To assess potential mechanisms, we will use the approach described by Baron  
751 and Kenny. To assess whether alcohol use (% HDD) is in the causal pathway between the intervention  
752 and biomarkers of inflammation (hsCRP and IL-6), we will evaluate whether the following conditions  
753 hold: a) alcohol use is related to inflammation; b) the intervention is related to alcohol use; c) the  
754 intervention is related to biomarkers of inflammation; and d) The effect of the interventions on  
755 inflammation reduces appreciably when alcohol use is added to the model. We will conduct confirmatory  
756 analyses using the counterfactual framework, an approach that allows potential interactions between the  
757 interventions and mediators and derives direct and indirect effects with different types of outcomes (e.g.,  
758 dichotomous). In addition to alcohol, we will also assess whether smoking is in the causal pathway  
759 between the interventions and markers of inflammation, CHD risk, and mortality risk.

## 761 **10. STAFF TRAINING**

762  
763  
764 All study staff will be trained on the study protocol, including administration of study medication,  
765 behavioral counseling, symptom monitoring, and participant assessment prior to initiation of  
766 recruitment and enrollment. Training will take place in-person in St. Petersburg and via webinars.



770  
771  
772  
773  
774  
775  
776  
777  
778  
779  
780  
781  
782  
783  
784  
785  
786  
787  
788  
789  
790  
791  
792  
793  
794  
795  
796  
797  
798  
799  
800

## REFERENCES

1. Freiberg MS, Chang CC, Kuller LH, Skanderson M, Lowy E, Kraemer KL, Butt AA, Bidwell Goetz M, Leaf D, Oursler KA, Rimland D, Rodriguez Barradas M, Brown S, Gibert C, McGinnis K, Crothers K, Sico J, Crane H, Warner A, Gottlieb S, Gottdiener J, Tracy RP, Budoff M, Watson C, Armah KA, Doebler D, Bryant K, Justice AC. HIV infection and the risk of acute myocardial infarction. *JAMA Intern Med.* 2013;173(8):614-622.
2. Kuller L, Group SS. Elevated levels of interleukin-6 and d-dimer are associated with an increased risk of death in patients with HIV. *Conference on Retroviruses and Opportunistic Infections.* 2008; 15th Conference on Retroviruses and Opportunistic Infections; Boston, MA.
3. Kuller LH, Tracy R, Belloso W, De Wit S, Drummond F, Lane HC, Ledergerber B, Lundgren J, Neuhaus J, Nixon D, Paton NI, Neaton JD, INSIGHT SMART Study Group. Inflammatory and coagulation biomarkers and mortality in patients with HIV infection. *PLoS Med.* 2008;5(10):e203. PMID: PMC2570418.
4. Baker JV, Neuhaus J, Duprez D, Kuller LH, Tracy R, Belloso WH, De Wit S, Drummond F, Lane HC, Ledergerber B, Lundgren J, Nixon DE, Paton NI, Neaton JD, for the INSIGHT SMART Study Group. Changes in inflammatory and

- 801 coagulation biomarkers: A randomized comparison of immediate versus deferred antiretroviral therapy in  
802 patients With HIV infection. *J Acquir Immune Defic Syndr*. 2011;56(1):36-43.
- 803 5. Triant VA, Meigs JB, Grinspoon SK. Association of C-reactive protein and HIV infection with acute myocardial  
804 infarction. *J Acquir Immune Defic Syndr*. 2009;51(3):268-273. PMID: PMC2763381.
- 805 6. Niaura R, Shadel WG, Morrow K, Tashima K, Flanigan T, Abrams DB. Human immunodeficiency virus infection,  
806 AIDS, and smoking cessation: the time is now. *Clin Infect Dis*. 2000;31(3):808-812.
- 807 7. Armah KA, McGinnis K, Baker J, Gibert C, Butt AA, Bryant KJ, Goetz M, Tracy R, Oursler KK, Rimland D, Crothers K,  
808 Rodriguez-Barradas M, Crystal S, Gordon A, Kraemer K, Brown S, Gerschenson M, Leaf DA, Deeks SG, Rinaldo  
809 C, Kuller LH, Justice A, Freiberg M. HIV status, burden of comorbid disease, and biomarkers of inflammation,  
810 altered coagulation, and monocyte activation. *Clin Infect Dis*. 2012;55(1):126-136.
- 811 8. Lifson AR, Neuhaus J, Arribas JR, van den Berg-Wolf M, Labriola AM, Read TR, INSIGHT SMART Study Group.  
812 Smoking-related health risks among persons with HIV in the Strategies for Management of Antiretroviral  
813 Therapy clinical trial. *Am J Public Health*. 2010;100(10):1896-1903. PMID: PMC2936972.
- 814 9. Helleberg M, Afzal S, Kronborg G, Larsen CS, Pedersen G, Pedersen C, Gerstoft J, Nordestgaard BG, Obel N.  
815 Mortality attributable to smoking among HIV-1-infected individuals: a nationwide, population-based cohort  
816 study. *Clin Infect Dis*. 2013;56(5):727-734.
- 817 10. Cahill K, Stead LF, Lancaster T. Nicotine receptor partial agonists for smoking cessation. *Cochrane Database Syst*  
818 *Rev*. 2012;4:CD006103.
- 819 11. West R, Zatonski W, Cedzynska M, Lewandowska D, Pazik J, Aveyard P, Stapleton J. Placebo-controlled trial of  
820 cytisine for smoking cessation. *N Engl J Med*. 2011;365(13):1193-1200.
- 821 12. Walker N, Howe C, Glover M, McRobbie H, Barnes J, Nosa V, Parag V, Bassett B, Bullen C. Cytisine versus nicotine  
822 for smoking cessation. *N Engl J Med*. 2014;371(25):2353-2362.
- 823 13. Hajek P, McRobbie H, Myers K. Efficacy of cytisine in helping smokers quit: systematic review and meta-  
824 analysis. *Thorax*. 2013;68(11):1037-1042.
- 825 14. Jorenby DE, Hays JT, Rigotti NA, Azoulay S, Watsky EJ, Williams KE, Billing CB, Gong J, Reeves KR, Varenicline  
826 Phase 3 Study Group. Efficacy of varenicline, an alpha4beta2 nicotinic acetylcholine receptor partial agonist,  
827 vs placebo or sustained-release bupropion for smoking cessation: a randomized controlled trial. *JAMA*.  
828 2006;296(1):56-63.
- 829 15. Mitchell JM, Teague CH, Kayser AS, Bartlett SE, Fields HL. Varenicline decreases alcohol consumption in heavy-  
830 drinking smokers. *Psychopharmacology (Berl)*. 2012;223(3):299-306. PMID: PMC3438402.
- 831 16. Fucito LM, Toll BA, Wu R, Romano DM, Tek E, O'Malley SS. A preliminary investigation of varenicline for heavy  
832 drinking smokers. *Psychopharmacology (Berl)*. 2011;215(4):655-663. PMID: PMC3645986.
- 833 17. McKee SA, Harrison EL, O'Malley SS, Krishnan-Sarin S, Shi J, Tetrault JM, Picciotto MR, Petrakis IL, Estevez N,  
834 Balchunas E. Varenicline reduces alcohol self-administration in heavy-drinking smokers. *Biol Psychiatry*.  
835 2009;66(2):185-190. PMID: PMC2863311.
- 836 18. Plebani JG, Lynch KG, Rennert L, Pettinati HM, O'Brien CP, Kampman KM. Results from a pilot clinical trial of  
837 varenicline for the treatment of alcohol dependence. *Drug Alcohol Depend*. 2013;133(2):754-758. PMID:  
838 PMC3866905.

- 839 19. Childs E, Roche DJ, King AC, de Wit H. Varenicline potentiates alcohol-induced negative subjective responses  
840 and offsets impaired eye movements. *Alcohol Clin Exp Res.* 2012;36(5):906-914. PMID: PMC3342420.
- 841 20. Meszaros ZS, Abdul-Malak Y, Dimmock JA, Wang D, Ajagbe TO, Batki SL. Varenicline treatment of concurrent  
842 alcohol and nicotine dependence in schizophrenia: a randomized, placebo-controlled pilot trial. *J Clin*  
843 *Psychopharmacol.* 2013;33(2):243-247.
- 844 21. Sajja RK, Rahman S. Cytisine modulates chronic voluntary ethanol consumption and ethanol-induced striatal  
845 up-regulation of DeltaFosB in mice. *Alcohol.* 2013;47(4):299-307.
- 846 22. Sajja RK, Rahman S. Neuronal nicotinic receptor ligands modulate chronic nicotine-induced ethanol  
847 consumption in C57BL/6J mice. *Pharmacol Biochem Behav.* 2012;102(1):36-43.
- 848 23. Bell RL, Eiler BJ, 2nd, Cook JB, Rahman S. Nicotinic receptor ligands reduce ethanol intake by high alcohol-  
849 drinking HAD-2 rats. *Alcohol.* 2009;43(8):581-592. PMID: PMC2813038.
- 850 24. Petoumenos K, Worm S, Reiss P, de Wit S, d'Arminio Monforte A, Sabin C, Friis-Moller N, Weber R, Mercie P,  
851 Pradier C, El-Sadr W, Kirk O, Lundgren J, Law M, D:A:D Study Group. Rates of cardiovascular disease following  
852 smoking cessation in patients with HIV infection: results from the D:A:D study(\*). *HIV Med.* 2011;12(7):412-  
853 421. PMID: PMC3070963.
- 854 25. Sobell LC, Sobell MB. *Alcohol Timeline Followback (TLFB) Users' Manual.* Toronto, Canada: Addiction Research  
855 Foundation; 1995.
- 856 26. Flannery BA, Volpicelli JR, Pettinati HM. Psychometric properties of the Penn Alcohol Craving Scale. *Alcohol Clin*  
857 *Exp Res.* 1999;23(8):1289-1295.
- 858 27. SRNT Subcommittee on Biochemical Verification. Biochemical verification of tobacco use and cessation.  
859 *Nicotine Tob Res.* 2002;4(2):149-159.
- 860 28. Perkins KA, Karelitz JL, Jao NC. Optimal carbon monoxide criteria to confirm 24-hr smoking abstinence.  
861 *Nicotine Tob Res.* 2013;15(5):978-982. PMID: PMC3733388.
- 862 29. Justice AC, Freiberg MS, Tracy R, Kuller L, Tate JP, Goetz MB, Fiellin DA, Vanasse GJ, Butt AA, Rodriguez-  
863 Barradas MC, Gibert C, Oursler KA, Deeks SG, Bryant K, the VACS Project Team. Does an Index Composed of  
864 Clinical Data Reflect Effects of Inflammation, Coagulation, and Monocyte Activation on Mortality Among Those  
865 Aging With HIV?. *Clin Infect Dis.* 2012.
- 866 30. Justice AC, Modur SP, Tate JP, Althoff KN, Jacobson LP, Gebo KA, Kitahata MM, Horberg MA, Brooks JT, Buchacz  
867 K, Rourke SB, Rachlis A, Napravnik S, Eron J, Willig JH, Moore R, Kirk GD, Bosch R, Rodriguez B, Hogg RS,  
868 Thorne J, Goedert JJ, Klein M, Gill J, Deeks S, Sterling TR, Anastos K, Gange SJ, NA-ACCORD and VACS Project  
869 Teams. Predictive accuracy of the Veterans Aging Cohort Study index for mortality with HIV infection: a North  
870 American cross cohort analysis. *J Acquir Immune Defic Syndr.* 2013;62(2):149-163. PMID: PMC3619393.
- 871 31. Litten RZ, Ryan ML, Fertig JB, Falk DE, Johnson B, Dunn KE, Green AI, Pettinati HM, Ciraulo DA, Sarid-Segal O,  
872 Kampman K, Brunette MF, Strain EC, Tiouririne NA, Ransom J, Scott C, Stout R, NCIG (National Institute on  
873 Alcohol Abuse and Alcoholism Clinical Investigations Group) Study Group. A double-blind, placebo-controlled  
874 trial assessing the efficacy of varenicline tartrate for alcohol dependence. *J Addict Med.* 2013;7(4):277-286.  
875 PMID: PMC3914416.
- 876 32. National Institute on Alcohol Abuse and Alcoholism. *A Pocket Guide for Alcohol Screening and Brief*  
877 *Intervention: Updated 2005 Edition.* Rockville, MD: National Institutes of Health; 2007.

- 878 33. Agency for Healthcare Research and Quality. Five major steps to intervention (the "5 A's").  
879 <http://www.ahrq.gov/professionals/clinicians-providers/guidelines-recommendations/tobacco/5steps.html>.  
880 Accessed December 8, 2015.
- 881 34. Carpenter MJ, Hughes JR, Gray KM, Wahlquist AE, Saladin ME, Alberg AJ. Nicotine therapy sampling to induce  
882 quit attempts among smokers unmotivated to quit: a randomized clinical trial. *Arch Intern Med*.  
883 2011;171(21):1901-1907.
- 884 35. Lindson-Hawley N, Banting M, West R, Michie S, Shinkins B, Aveyard P. Gradual Versus Abrupt Smoking  
885 CessationA Randomized, Controlled Noninferiority TrialGradual Versus Abrupt Smoking Cessation. *Ann Intern*  
886 *Med*. 2016;164(9):585-592.
- 887 36. Lerman C, Schnoll RA, Hawk LW,Jr, Cinciripini P, George TP, Wileyto EP, Swan GE, Benowitz NL, Heitjan DF,  
888 Tyndale RF, PGRN-PNAT Research Group. Use of the nicotine metabolite ratio as a genetically informed  
889 biomarker of response to nicotine patch or varenicline for smoking cessation: a randomised, double-blind  
890 placebo-controlled trial. *Lancet Respir Med*. 2015;3(2):131-138. PMID: PMC4480925.
- 891 37. Anthenelli RM, Benowitz NL, West R, St Aubin L, McRae T, Lawrence D, Ascher J, Russ C, Krishen A, Evins AE.  
892 Neuropsychiatric safety and efficacy of varenicline, bupropion, and nicotine patch in smokers with and  
893 without psychiatric disorders (EAGLES): a double-blind, randomised, placebo-controlled clinical trial. *Lancet*.  
894 2016.

895
