# Supplementary material for: Effectiveness of Varenicline and Cytisine for Alcohol Use Reduction Among People With HIV and Substance Use: A Randomized Clinical Trial
Source: PubMed Central journal article supplement (PMC9356316; doi:10.1001/jamanetworkopen.2022.25129), 2022-08-05
Supplement: jamanetwopen-e2225129-s002.pdf [file jamanetwopen-e2225129-s002.pdf]

## Supplemental Online Content

Tindle HA, Freiberg MS, Cheng DM, et al. Effectiveness of varenicline and cytisine for alcohol use reduction among people with HIV and substance use: a randomized clinical trial. *JAMA Netw Open*. 2022;5(8):e2225129. doi:10.1001/jamanetworkopen.2022.25129

**eFigure 1.** Schedule for Study Medications

**eTable 1.** Imputed Rates of Alcohol and Smoking Abstinence

**eTable 2.** Self-Reported Adherence to Study Medications by Treatment Group and Medication Type

**eTable 3.** Per-Protocol Analysis of Heavy Drinking Days and Smoking Outcomes Among Participants Who Were Adherent to Study Medication

**eTable 4.** Adverse Events

**eTable 5.** Post Hoc Analyses Examining No. of Heavy Drinking Days and Percent With Alcohol Abstinence by Smoking Status at 3, 6, and 12 mo

This supplemental material has been provided by the authors to give readers additional information about their work.

**eFigure 1.** Schedule for Study Medications

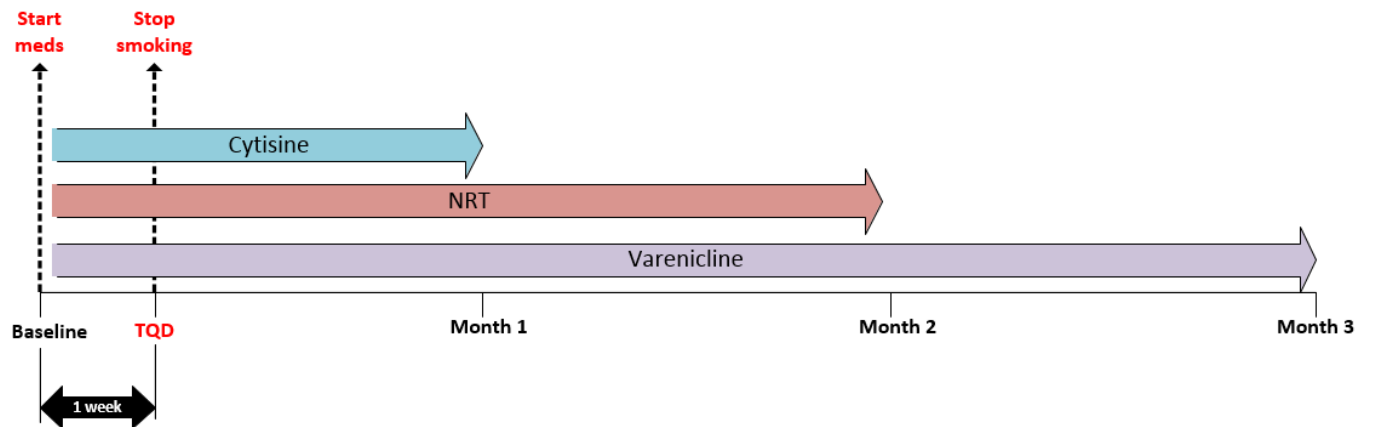

Cytisine followed a traditional 25-day downward titration schedule. Nicotine replacement spray was provided for 8 weeks, and varenicline for 12 weeks. As noted in Figure 1, all participants received one active medication and one placebo medication. At baseline, all participants received brief counseling for smoking and drinking alcohol, began study medication, and were advised to quit smoking on the target quit date (TQD) one week later.

**eTable 1. Imputed Rates of Alcohol and Smoking Abstinence (N = 400)**

| Outcome                        | Varenicline Group <sup>a</sup> |                | Cytisine Group <sup>a</sup> |                 |
|--------------------------------|--------------------------------|----------------|-----------------------------|-----------------|
|                                | Group 1 (n=100)                | Group 2 (n=99) | Group 3 (m=100)             | Group 4 (n=101) |
| <b>3 Months</b>                |                                |                |                             |                 |
| Abstinence                     |                                |                |                             |                 |
| Alcohol <sup>b</sup> , No (%)  | 23 (23.0%)                     | 19 (19.2%)     | 22 (22.0%)                  | 20 (19.8%)      |
| Smoking <sup>c</sup> , No. (%) | 24 (24.0%)                     | 13 (13.1%)     | 26 (26.0%)                  | 22 (21.8%)      |
| <b>6 Months</b>                |                                |                |                             |                 |
| Smoking abstinence, No. (%)    | 15 (15.0%)                     | 17 (17.2%)     | 19 (19.0%)                  | 19 (18.8%)      |
| <b>12 Months</b>               |                                |                |                             |                 |
| Smoking abstinence, No. (%)    | 17 (17.0%)                     | 17 (17.2%)     | 24 (24.0%)                  | 21 (20.8%)      |

<sup>a</sup> Group 1 received active varenicline and placebo nicotine replacement therapy; group 2 received placebo varenicline and active nicotine replacement therapy; group 3 received active cytisine and placebo nicotine replacement therapy; group 4 received placebo cytisine and active nicotine replacement therapy.

<sup>b</sup> Alcohol abstinence was defined as self-report of no alcohol use in the prior 30 days and biochemically validated with a phosphatidylethanol level of less than 8 ng/ml.

<sup>c</sup> Smoking abstinence was defined a self-reported 7-day point prevalent abstinence that was biochemically validated using a threshold of carbon monoxide level of less than 10 ppm.

**eTable 2.** Self-Reported Adherence to Study Medications by Treatment Group and Medication Type

| Adherence                                       | Overall <sup>a</sup>     | Arm 1<br>Active<br>Varenicline<br>+ Placebo<br>NRT | Arm 2<br>Placebo<br>Varenicline<br>+ Active NRT | Arm 3<br>Active<br>Cytisine +<br>Placebo NRT | Arm 4<br>Placebo<br>Cytisine +<br>Active NRT | p-value |
|-------------------------------------------------|--------------------------|----------------------------------------------------|-------------------------------------------------|----------------------------------------------|----------------------------------------------|---------|
|                                                 | Participants, No.<br>(%) | Participants,<br>No. (%)                           | Participants,<br>No. (%)                        | Participants,<br>No. (%)                     | Participants,<br>No. (%)                     |         |
| <b>Adherence to<br/>pills (Yes<sup>b</sup>)</b> | 348 (87)                 | 91 (91)                                            | 84 (84.8)                                       | 86 (86)                                      | 87 (86.1)                                    | 0.58    |
| <b>Adherence to<br/>spray (Yes<sup>b</sup>)</b> | 238 (59.5)               | 64 (64)                                            | 62 (62.6)                                       | 57 (57)                                      | 55 (54.5)                                    | 0.46    |

<sup>a</sup> The proportion of participants adherent to pills was greater than the proportion of participants adherent to spray ( $p < 0.001$ ).

<sup>b</sup> Participants were considered adherent to study pills if they self-reported taking at least 80% of their assigned study medication. Given differing treatment regimens, the definition of adherence allowed for differences by medication type, i.e., taking at least 80% of assigned medication at 2 of 3 study visits prior to the 1-month visit for cytisine and at 4 of 7 study visits prior to the 3-month visit for varenicline. Participants were considered adherent to study mouth spray if: 1) during weeks 1-4 of treatment they self-reported using at least 8 sprays per day at least 80% of the days in the last week at 2 of 3 study visits; and 2) during weeks 5-8 of treatment if they used the spray at least 80% of times when having an urge to smoke at 1 of 2 study visits prior to the 2-month visit.

**eTable 3.** Per-Protocol Analysis of Heavy Drinking Days and Smoking Outcomes Among Participants Who Were Adherent to Study Medication

| Outcome                                                                                            | Arm 1 vs. Arm 2<br>Active Varenicline vs. Active NRT (N=153) |         | Arm 3 vs. Arm 4<br>Active Cytisine vs. Active NRT (N=141) |         | Arm 1 vs. Arm 3<br>Active Varenicline vs. Active Cytisine (N=177) |         |
|----------------------------------------------------------------------------------------------------|--------------------------------------------------------------|---------|-----------------------------------------------------------|---------|-------------------------------------------------------------------|---------|
|                                                                                                    | Incidence Rate Ratio (95% CI)                                | p-value | Incidence Rate Ratio (95% CI)                             | p-value | Incidence Rate Ratio (95% CI)                                     | p-value |
| Number of Heavy Drinking Days in the past 30 days at 3 months (Primary study outcome) <sup>a</sup> | 0.92 (0.44-1.96)                                             | 0.83    | 0.47 (0.21-1.05)                                          | 0.20    | 1.24 (0.60-2.54)                                                  | 0.83    |
| Cigarettes smoked per day in the past 7 days at 3 months <sup>b</sup>                              | 0.78 (0.44-1.37)                                             | 0.77    | 1.09 (0.60-1.97)                                          | 0.77    | 0.67 (0.40-1.12)                                                  | 0.38    |
|                                                                                                    | Odds Ratio (95% CI)                                          | p-value | Odds Ratio (95% CI)                                       | p-value | Odds Ratio (95% CI)                                               | p-value |
| Smoking abstinence at 3 months <sup>c</sup>                                                        | 2.10 (0.85-5.22)                                             | 0.33    | 1.06 (0.45-2.47)                                          | 0.93    | 0.97 (0.47-2.01)                                                  | 0.93    |
| Smoking abstinence at 6 months                                                                     | 0.82 (0.32-2.08)                                             | 0.67    | 0.72 (0.28-1.81)                                          | 0.67    | 0.80 (0.33-1.90)                                                  | 0.67    |

<sup>a</sup> At 3 months, mean (SD) HDD for Arms 1, 2, 3 and 4, respectively: 1.9 (3.6); 2.2 (4.6); 1.5 (3.3); 3.1 (6.3)

<sup>b</sup> At 3 months, mean (SD) cigarettes smoked per day for Arms 1, 2, 3 and 4, respectively: 4.3 (5.6); 5.5 (7.3); 6.3 (7.5); 6.3 (7.6).

<sup>c</sup> Smoking abstinence defined as self-reported 7-day point prevalence abstinence that is biochemically validated using a threshold of carbon monoxide (CO) < 10 ppm. At 3 months, smoking cessation for Arms 1, 2, 3 and 4, respectively: 24.2%; 14.5%; 25.6%; 21.8%. At 6 months, smoking cessation for Arms 1, 2, 3 and 4, respectively: 15.4%; 17.7%; 18.6%; 21.8%.

**eTable 4.** Adverse Events

| Adverse Event                    | Active Varenicline +<br>Placebo NRT |          |        | Placebo Varenicline +<br>Active NRT |          |        | Active Cytisine +<br>Placebo NRT |          |        | Placebo Cytisine +<br>Active NRT |          |        |
|----------------------------------|-------------------------------------|----------|--------|-------------------------------------|----------|--------|----------------------------------|----------|--------|----------------------------------|----------|--------|
|                                  | Mild                                | Moderate | Severe | Mild                                | Moderate | Severe | Mild                             | Moderate | Severe | Mild                             | Moderate | Severe |
| ABNORMAL ECHO                    | 0                                   | 1        | 0      | 0                                   | 0        | 0      | 0                                | 0        | 0      | 0                                | 0        | 0      |
| ACUTE OTITIS                     | 0                                   | 0        | 0      | 0                                   | 0        | 0      | 0                                | 0        | 1      | 0                                | 0        | 0      |
| AGITATION AND/OR<br>IRRITABILITY | 2                                   | 0        | 0      | 0                                   | 0        | 0      | 0                                | 1        | 0      | 1                                | 0        | 0      |
| ANEMIA                           | 0                                   | 1        | 0      | 0                                   | 0        | 1      | 0                                | 3        | 0      | 0                                | 1        | 0      |
| ARTERIAL HYPERTENSION            | 0                                   | 1        | 0      | 0                                   | 0        | 0      | 0                                | 1        | 0      | 0                                | 0        | 0      |
| BLOATING                         | 1                                   | 0        | 0      | 1                                   | 0        | 0      | 0                                | 0        | 0      | 0                                | 0        | 0      |
| COLD                             | 0                                   | 2        | 0      | 0                                   | 1        | 0      | 0                                | 0        | 0      | 0                                | 0        | 0      |
| DEPRESSED MOOD                   | 0                                   | 0        | 0      | 0                                   | 0        | 0      | 0                                | 1        | 0      | 0                                | 0        | 0      |
| DIARRHEA                         | 3                                   | 0        | 0      | 1                                   | 0        | 0      | 0                                | 0        | 0      | 0                                | 0        | 0      |
| DIZZINESS                        | 0                                   | 0        | 0      | 2                                   | 0        | 0      | 0                                | 1        | 0      | 0                                | 0        | 0      |
| DRY MOUTH                        | 1                                   | 0        | 0      | 0                                   | 0        | 0      | 0                                | 0        | 0      | 0                                | 0        | 0      |
| DYSPNEA                          | 1                                   | 0        | 0      | 0                                   | 0        | 0      | 0                                | 0        | 0      | 0                                | 0        | 0      |
| ELEVATED ALT/AST                 | 0                                   | 2        | 2      | 0                                   | 1        | 3      | 0                                | 6        | 2      | 0                                | 3        | 3      |

| Adverse Event                              | Active Varenicline +<br>Placebo NRT |          |        | Placebo Varenicline +<br>Active NRT |          |        | Active Cytisine +<br>Placebo NRT |          |        | Placebo Cytisine +<br>Active NRT |          |        |
|--------------------------------------------|-------------------------------------|----------|--------|-------------------------------------|----------|--------|----------------------------------|----------|--------|----------------------------------|----------|--------|
|                                            | Mild                                | Moderate | Severe | Mild                                | Moderate | Severe | Mild                             | Moderate | Severe | Mild                             | Moderate | Severe |
| FATIGUE                                    | 0                                   | 0        | 0      | 0                                   | 0        | 0      | 0                                | 1        | 0      | 0                                | 0        | 0      |
| FEVER                                      | 0                                   | 1        | 0      | 0                                   | 0        | 0      | 0                                | 0        | 0      | 0                                | 1        | 0      |
| FLATULENCE                                 | 1                                   | 0        | 0      | 0                                   | 0        | 0      | 0                                | 0        | 0      | 0                                | 0        | 0      |
| FRACTURE OF ARM                            | 0                                   | 0        | 0      | 0                                   | 0        | 0      | 0                                | 1        | 0      | 0                                | 0        | 0      |
| GENERALIZED MUSCLE<br>WEAKNESS             | 0                                   | 0        | 0      | 0                                   | 0        | 0      | 0                                | 1        | 0      | 0                                | 0        | 0      |
| HEADACHES                                  | 1                                   | 0        | 0      | 1                                   | 0        | 0      | 0                                | 2        | 0      | 0                                | 0        | 0      |
| HEPATITIS C                                | 0                                   | 0        | 0      | 1                                   | 0        | 0      | 0                                | 0        | 0      | 0                                | 0        | 0      |
| HICCUPS                                    | 0                                   | 0        | 0      | 1                                   | 1        | 0      | 1                                | 0        | 0      | 4                                | 0        | 0      |
| INSOMNIA<br>AND/OR OTHER SLEEP<br>PROBLEMS | 1                                   | 0        | 0      | 0                                   | 0        | 0      | 0                                | 1        | 0      | 0                                | 0        | 0      |
| ITCH                                       | 1                                   | 1        | 0      | 0                                   | 0        | 0      | 0                                | 0        | 0      | 0                                | 0        | 0      |
| METALLIC TASTE IN<br>MOUTH                 | 0                                   | 0        | 0      | 1                                   | 0        | 0      | 0                                | 0        | 0      | 0                                | 0        | 0      |
| MYOCARDIAL INFARCTION                      | 0                                   | 0        | 0      | 0                                   | 0        | 2      | 0                                | 0        | 0      | 0                                | 0        | 0      |
| NAUSEA                                     | 0                                   | 0        | 0      | 5                                   | 2        | 0      | 1                                | 1        | 0      | 3                                | 1        | 0      |
| PAIN IN BACK                               | 0                                   | 0        | 0      | 0                                   | 0        | 0      | 0                                | 0        | 0      | 0                                | 1        | 0      |

| Adverse Event                       | Active Varenicline +<br>Placebo NRT |          |        | Placebo Varenicline +<br>Active NRT |          |        | Active Cytisine +<br>Placebo NRT |          |        | Placebo Cytisine +<br>Active NRT |          |        |
|-------------------------------------|-------------------------------------|----------|--------|-------------------------------------|----------|--------|----------------------------------|----------|--------|----------------------------------|----------|--------|
|                                     | Mild                                | Moderate | Severe | Mild                                | Moderate | Severe | Mild                             | Moderate | Severe | Mild                             | Moderate | Severe |
| PANCREATITIS                        | 0                                   | 0        | 1      | 0                                   | 0        | 0      | 0                                | 0        | 0      | 0                                | 0        | 0      |
| PNEUMONIA                           | 0                                   | 0        | 1      | 0                                   | 0        | 1      | 0                                | 0        | 0      | 0                                | 0        | 0      |
| POST-INFARCTION<br>DISORDERS        | 0                                   | 0        | 0      | 0                                   | 1        | 0      | 0                                | 0        | 0      | 0                                | 0        | 0      |
| RESTLESSNESS                        | 0                                   | 0        | 0      | 0                                   | 0        | 0      | 0                                | 1        | 0      | 0                                | 0        | 0      |
| STRANGE DREAMS<br>AND/OR NIGHTMARES | 1                                   | 0        | 0      | 0                                   | 0        | 0      | 0                                | 1        | 0      | 0                                | 0        | 0      |
| SWEATING                            | 0                                   | 0        | 0      | 0                                   | 0        | 0      | 1                                | 0        | 0      | 0                                | 0        | 0      |
| TACHYCARDIA                         | 0                                   | 0        | 0      | 0                                   | 0        | 0      | 1                                | 0        | 0      | 0                                | 0        | 0      |
| THROAT IRRITATION                   | 1                                   | 0        | 0      | 1                                   | 2        | 0      | 0                                | 0        | 0      | 2                                | 0        | 0      |
| THROAT PAIN                         | 0                                   | 0        | 0      | 1                                   | 0        | 0      | 0                                | 0        | 0      | 0                                | 0        | 0      |
| THROMBOCYTOPENIA                    | 0                                   | 1        | 0      | 0                                   | 1        | 1      | 0                                | 0        | 0      | 0                                | 0        | 0      |
| UTERINE BLEED                       | 0                                   | 0        | 0      | 0                                   | 0        | 0      | 0                                | 0        | 1      | 0                                | 0        | 0      |
| VOMITING                            | 0                                   | 0        | 0      | 0                                   | 0        | 0      | 1                                | 0        | 0      | 0                                | 0        | 0      |
|                                     |                                     |          |        |                                     |          |        |                                  |          |        |                                  |          |        |
|                                     |                                     |          |        |                                     |          |        |                                  |          |        |                                  |          |        |
|                                     |                                     |          |        |                                     |          |        |                                  |          |        |                                  |          |        |



| Serious Adverse Events       |                                     |       |                                     |       |                                  |       |                                  |       |
|------------------------------|-------------------------------------|-------|-------------------------------------|-------|----------------------------------|-------|----------------------------------|-------|
| Event Description            | Active Varenicline +<br>Placebo NRT |       | Placebo Varenicline +<br>Active NRT |       | Active Cytisine +<br>Placebo NRT |       | Placebo Cytisine +<br>Active NRT |       |
|                              | Severe                              | Fatal | Severe                              | Fatal | Severe                           | Fatal | Severe                           | Fatal |
| ACUTE ALCOHOL<br>POISONING   | 0                                   | 0     | 0                                   | 2     | 0                                | 1     | 0                                | 0     |
| ACUTE HEART FAILURE          | 0                                   | 1     | 0                                   | 1     | 0                                | 0     | 0                                | 0     |
| ACUTE OTITIS,<br>MASTIODITIS | 0                                   | 0     | 0                                   | 0     | 1                                | 0     | 0                                | 0     |
| HODGKIN'S DISEASE            | 0                                   | 1     | 0                                   | 0     | 0                                | 0     | 0                                | 0     |
| MYOCARDIAL INFARCTION        | 0                                   | 0     | 2                                   | 0     | 0                                | 0     | 0                                | 0     |
| OPIOID OVERDOSE              | 0                                   | 0     | 0                                   | 0     | 1                                | 0     | 0                                | 1     |
| PANCREATITIS                 | 1                                   | 0     | 0                                   | 0     | 0                                | 0     | 0                                | 0     |
| PNEUMONIA                    | 1                                   | 2     | 1                                   | 0     | 0                                | 0     | 0                                | 0     |
| SEPSIS                       | 0                                   | 0     | 0                                   | 0     | 0                                | 1     | 0                                | 0     |
| TUBERCULOSIS                 | 0                                   | 0     | 1                                   | 0     | 0                                | 0     | 1                                | 0     |
| UTERINE BLEED                | 0                                   | 0     | 0                                   | 0     | 1                                | 0     | 0                                | 0     |

**eTable 5.** Post Hoc Analyses Examining No. of Heavy Drinking Days and Percent With Alcohol Abstinence by Smoking Status at 3, 6, and 12 mo

| Trial Arm                                                               | Smoking Abstinence <sup>a</sup><br>at 3, 6, 12 months |                    |
|-------------------------------------------------------------------------|-------------------------------------------------------|--------------------|
|                                                                         | Yes                                                   | No                 |
| <b>Heavy Drinking Days at 3 Months (Mean, SD)</b>                       |                                                       |                    |
| Active Varenicline + Placebo NRT                                        | N=24<br>0.9 (1.8)                                     | N=76<br>2.4 (4.2)  |
| Placebo Varenicline + Active NRT                                        | N=13<br>0.7 (1.8)                                     | N=86<br>2.3 (4.5)  |
| Active Cytisine + Placebo NRT                                           | N=26<br>0.6 (1.6)                                     | N=74<br>1.8 (3.7)  |
| Placebo Cytisine + Active NRT                                           | N=22<br>0.8 (1.8)                                     | N=79<br>2.9 (5.7)  |
| Overall (all treatment arms)                                            | N=85<br>0.7 (1.8)                                     | N=315<br>2.3 (4.6) |
| <b>Alcohol Abstinence (PEth-verified) at 3 Months<sup>b</sup> n (%)</b> |                                                       |                    |
| Active Varenicline + Placebo NRT                                        | 10 (41.7%)                                            | 13 (17.1%)         |
| Placebo Varenicline + Active NRT                                        | 7 (53.8%)                                             | 12 (14.0%)         |
| Active Cytisine + Placebo NRT                                           | 7 (26.9%)                                             | 15 (20.3%)         |
| Placebo Cytisine + Active NRT                                           | 6 (27.3%)                                             | 14 (17.7%)         |
| Overall (all treatment arms)                                            | 30 (35.3%)                                            | 54 (17.1%)         |
| <b>Heavy Drinking Days at 6 Months (Mean, SD)</b>                       |                                                       |                    |
| Active Varenicline + Placebo NRT                                        | N=15<br>1.5 (3.9)                                     | N=85<br>1.9 (3.9)  |
| Placebo Varenicline + Active NRT                                        | N=17<br>0.6 (1.5)                                     | N=82<br>1.4 (2.8)  |
| Active Cytisine + Placebo NRT                                           | N=19<br>2.0 (5.4)                                     | N=81<br>1.5 (3.1)  |
| Placebo Cytisine + Active NRT                                           | N=19<br>0.6 (1.6)                                     | N=82<br>2.7 (5.5)  |
| Overall (all treatment arms)                                            | N=70<br>1.2 (3.7)                                     | N=330<br>1.9 (4.0) |
| <b>Alcohol Abstinence (self-reported) at 6 Months n (%)</b>             |                                                       |                    |
| Active Varenicline + Placebo NRT                                        | 8 (53.3%)                                             | 20 (23.5%)         |
| Placebo Varenicline + Active NRT                                        | 10 (58.8%)                                            | 25 (30.5%)         |
| Active Cytisine + Placebo NRT                                           | 10 (52.6%)                                            | 28 (34.6%)         |
| Placebo Cytisine + Active NRT                                           | 10 (52.6%)                                            | 24 (29.3%)         |
| Overall (all treatment arms)                                            | 38 (54.3%)                                            | 97 (29.4%)         |
| <b>Heavy Drinking Days at 12 Months (Mean, SD)</b>                      |                                                       |                    |
| Active Varenicline + Placebo NRT                                        | N=17<br>1.6 (4.8)                                     | N=83<br>3.6 (6.8)  |
| Placebo Varenicline + Active NRT                                        | N=17<br>1.5 (3.9)                                     | N=82<br>2.7 (5.6)  |
| Active Cytisine + Placebo NRT                                           | N=24<br>1.7 (4.7)                                     | N=76<br>3.3 (6.7)  |
| Placebo Cytisine + Active NRT                                           | N=21<br>2.4 (4.6)                                     | N=80<br>4.1 (7.8)  |
| Overall (all treatment arms)                                            | N=79<br>1.8 (4.7)                                     | N=321<br>3.4 (6.8) |

| Trial Arm                                                    | Smoking Abstinence <sup>a</sup><br>at 3, 6, 12 months |             |
|--------------------------------------------------------------|-------------------------------------------------------|-------------|
|                                                              | Yes                                                   | No          |
| <b>Alcohol Abstinence (self-reported) at 12 Months n (%)</b> |                                                       |             |
| Active Varenicline + Placebo NRT                             | 6 (35.3%)                                             | 23 (27.7%)  |
| Placebo Varenicline + Active NRT                             | 9 (52.9%)                                             | 26 (31.7%)  |
| Active Cytisine + Placebo NRT                                | 13 (54.2%)                                            | 26 (34.2%)  |
| Placebo Cytisine + Active NRT                                | 9 (42.9%)                                             | 26 (32.5%)  |
| Overall (all treatment arms)                                 | 37 (46.8%)                                            | 101 (31.5%) |

<sup>a</sup> Smoking abstinence defined as self-reported 7-day point prevalence abstinence that is biochemically validated using a threshold of carbon monoxide (CO) < 10 ppm

<sup>b</sup> Alcohol abstinence defined as self-report of no alcohol use in past 30 days and PEth < 8 ng/mL
